# Supplementary material for: A unified cost-effective method for the construction of reliable potential energy surfaces for H2S and H2O clusters
Source: Royal Society of Chemistry journal article supplement (doi:10.1039/d1cp01544c), 2021-01-01
Supplement: d1cp01544c1.pdf [file d1cp01544c1.pdf]

**Supporting Information**

for

**A unified cost effective method for construction of reliable potential  
energy surfaces for H<sub>2</sub>S and H<sub>2</sub>O clusters**

Monu, Binod Kumar Oram, Biman Bandyopadhyay\*

Department of Chemistry, Malaviya National Institute of Technology Jaipur, JLN Marg, Jaipur–  
302017, India

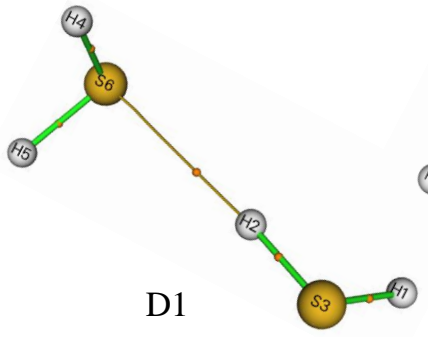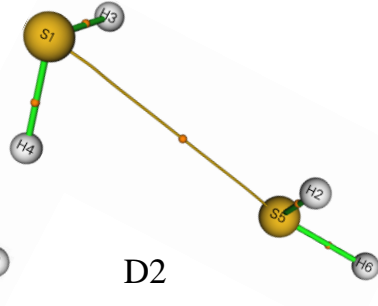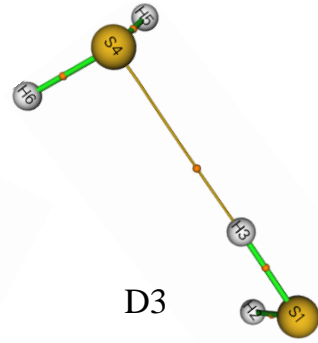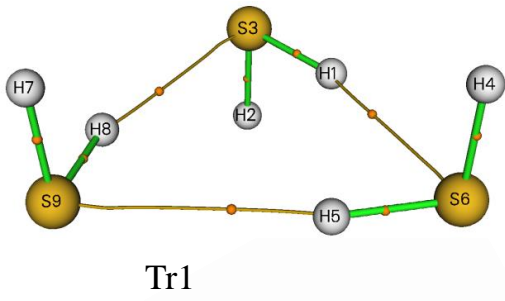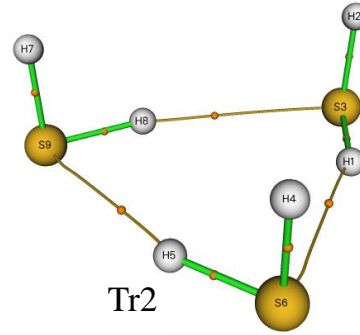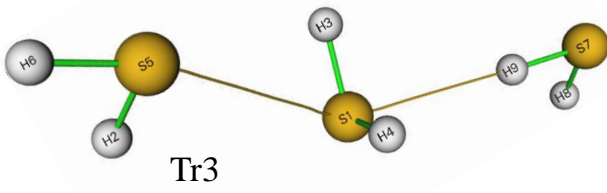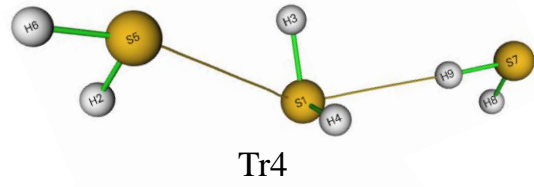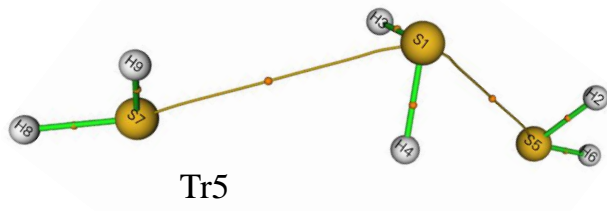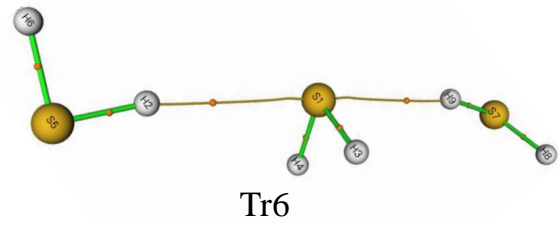

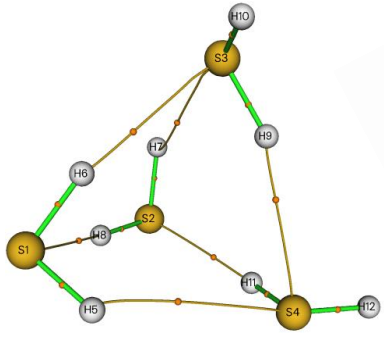

Te1

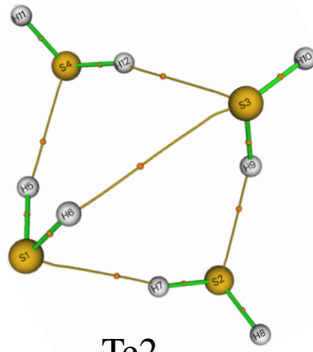

Te2

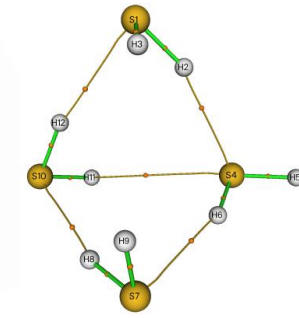

Te3

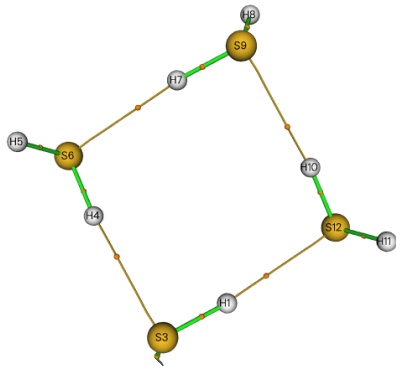

Te4

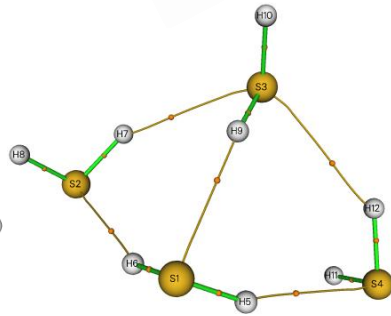

Te5

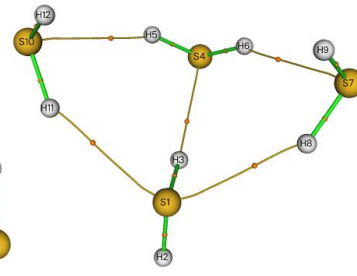

Te6

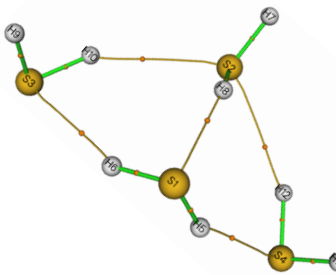

Te7

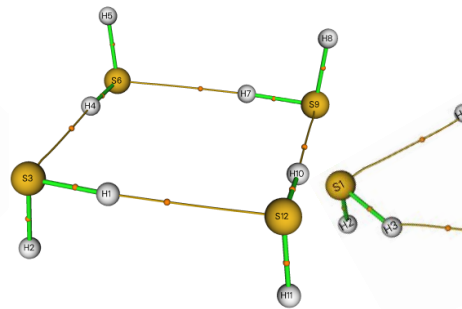

Te8

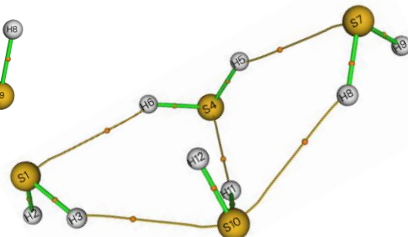

Te9

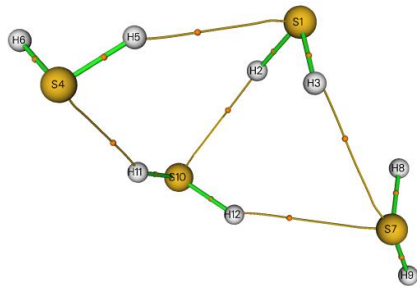

Te10

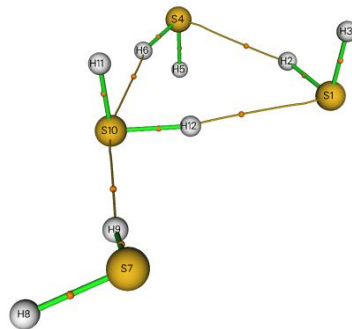

Te11

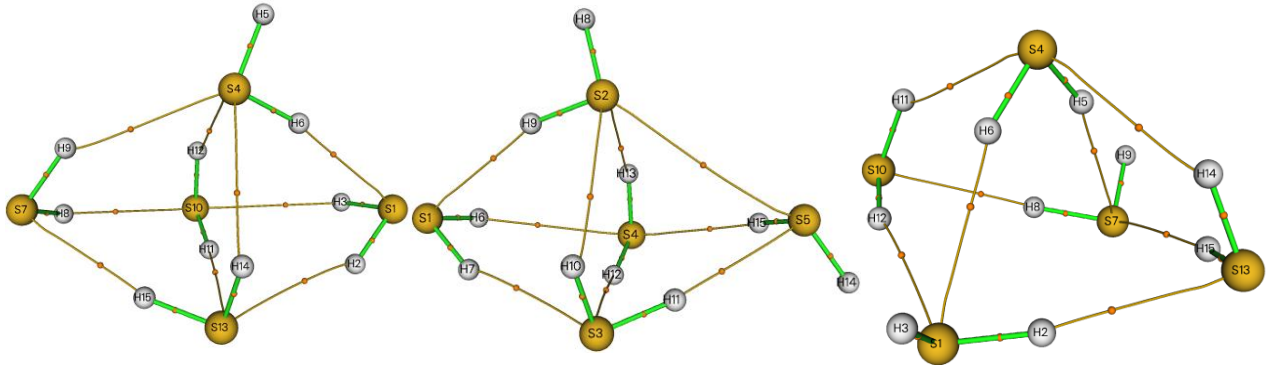

P1

P2

P3

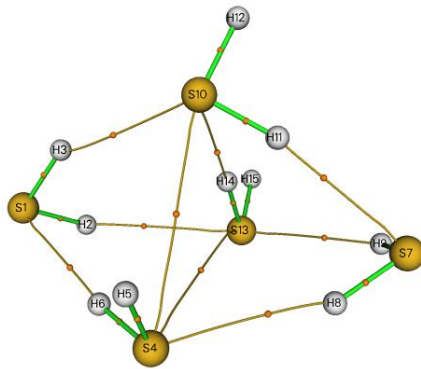

P4

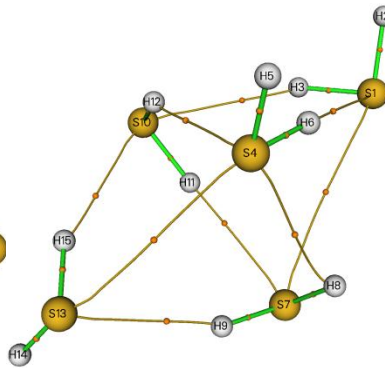

P5

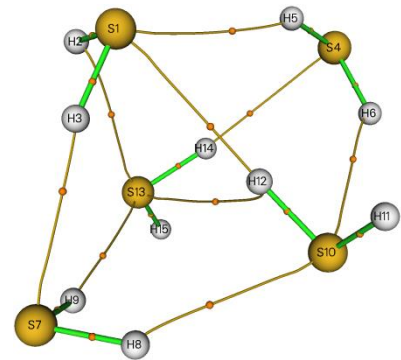

P6

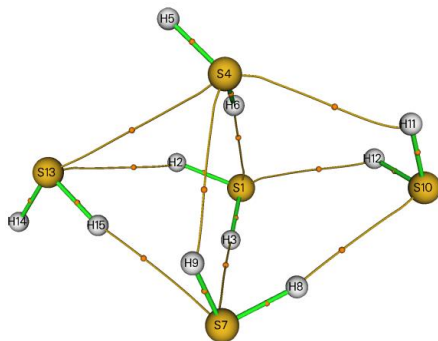

P7

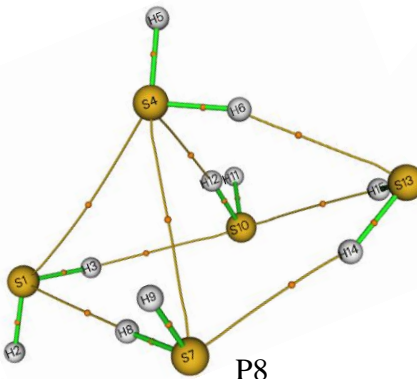

P8

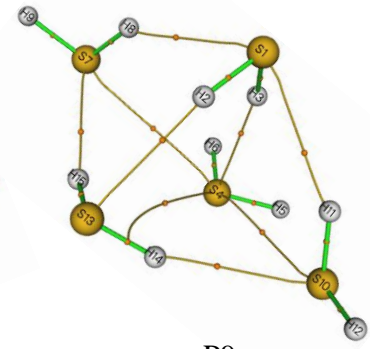

P9

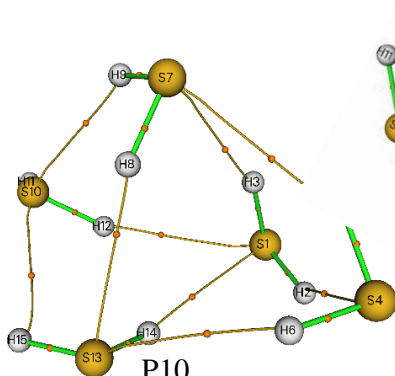

P10

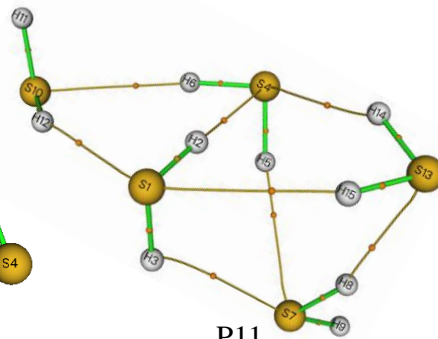

P11

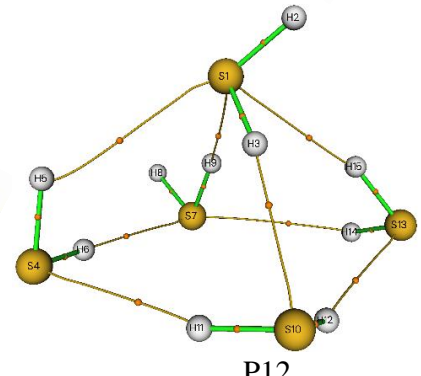

P12

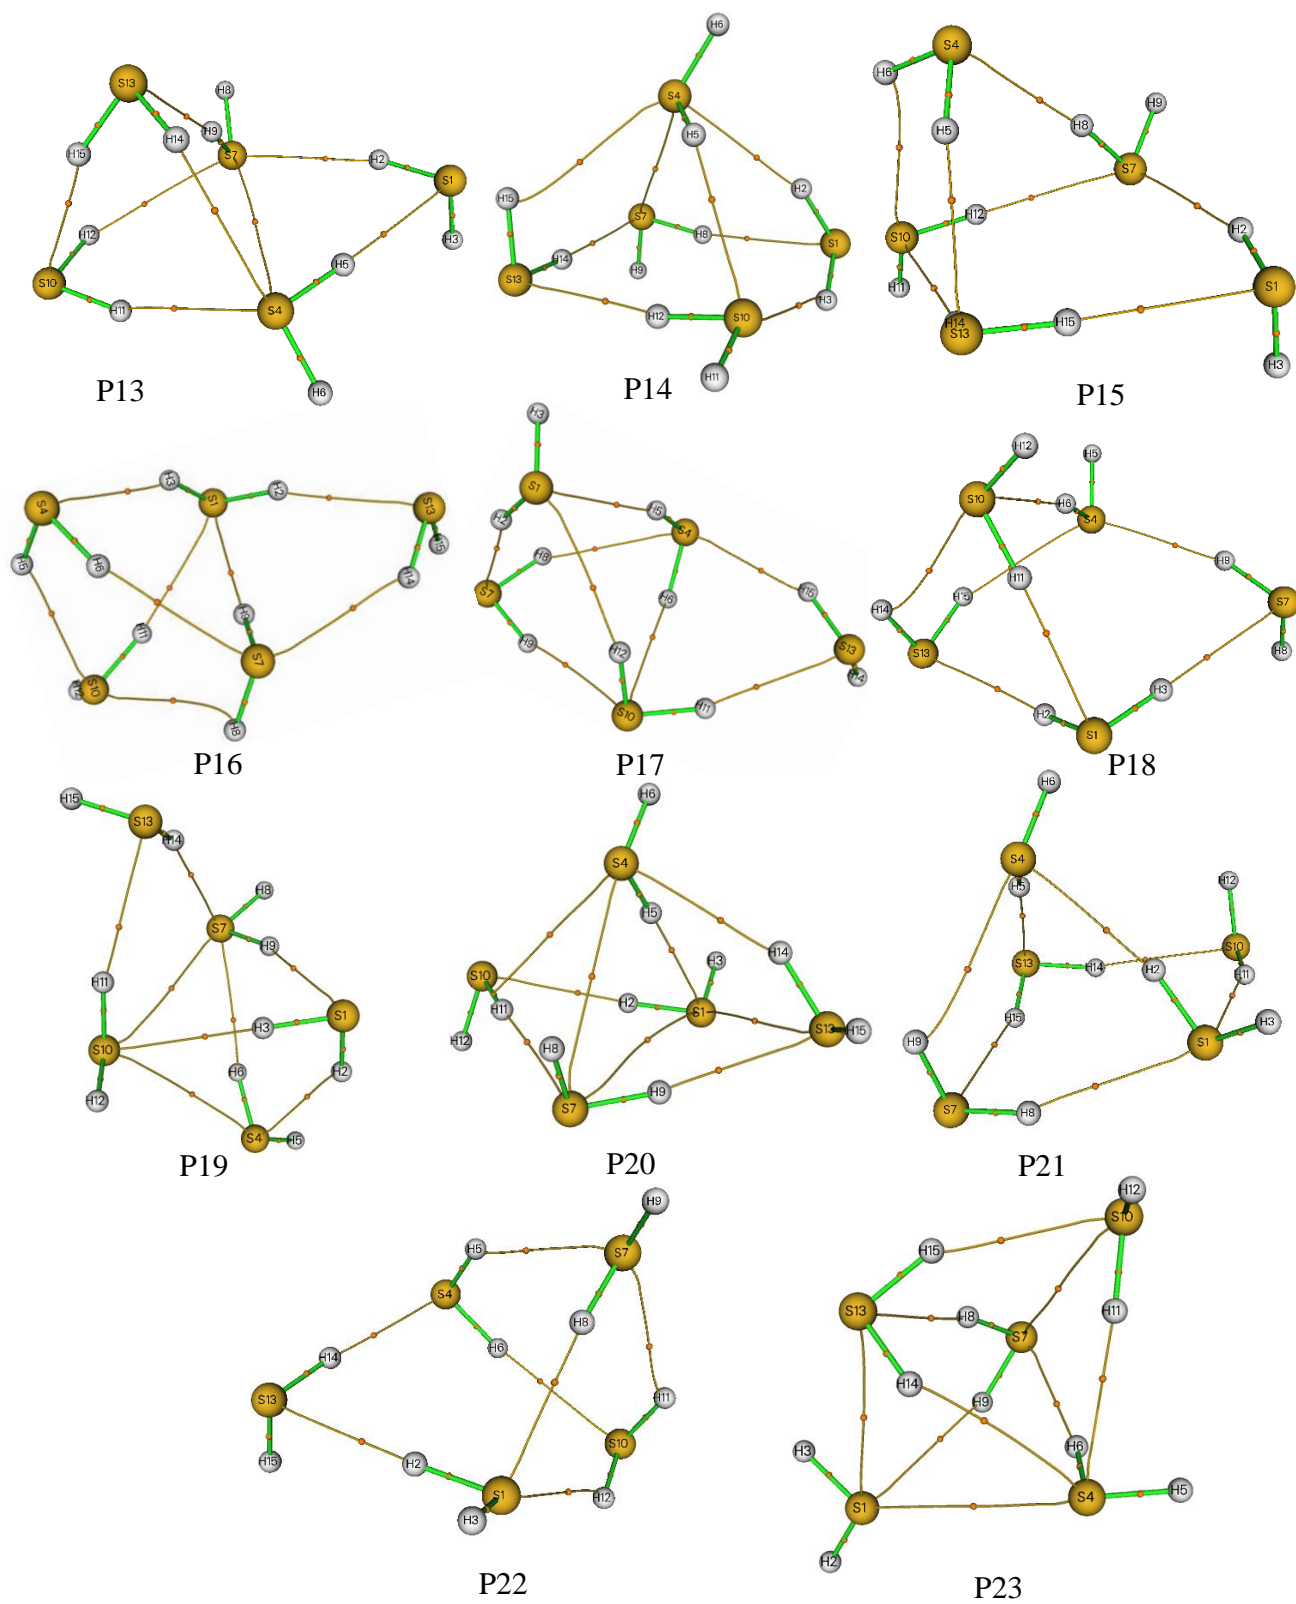

**FigureS1:** Molecular geometries of  $(\text{H}_2\text{S})_n$ ,  $n = 2-5$  cluster optimized at  $\omega\text{B97XD/aug-cc-pV(D+d)Z}$  level of theory.

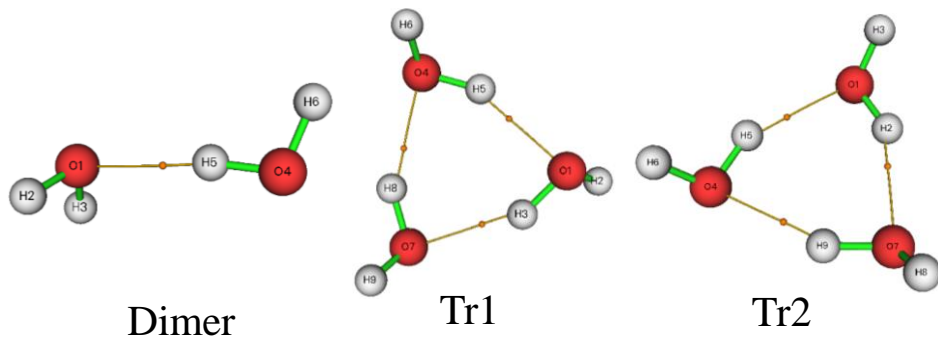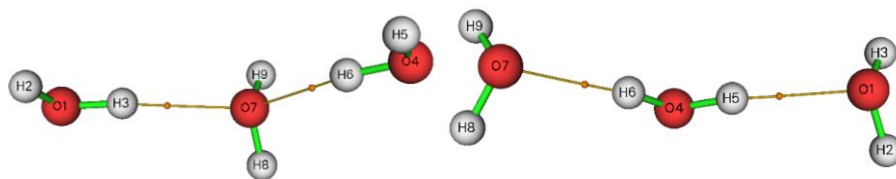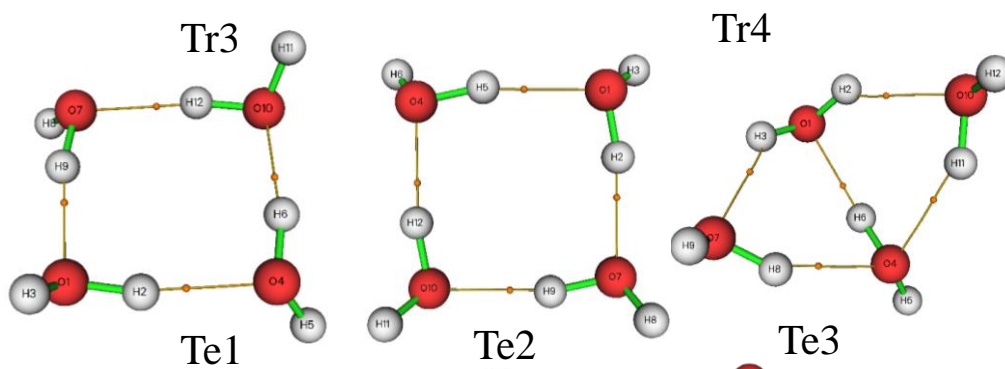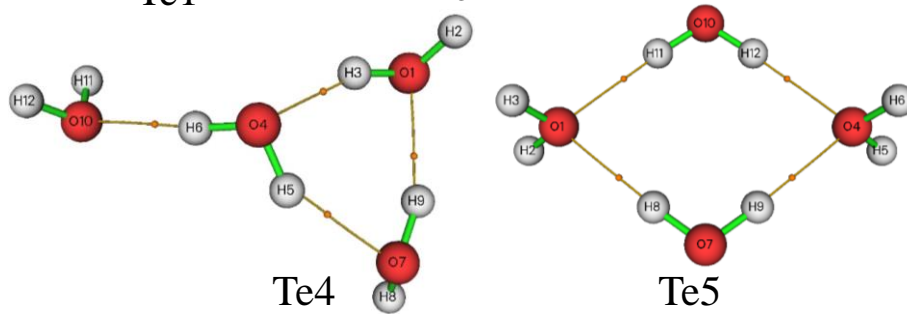

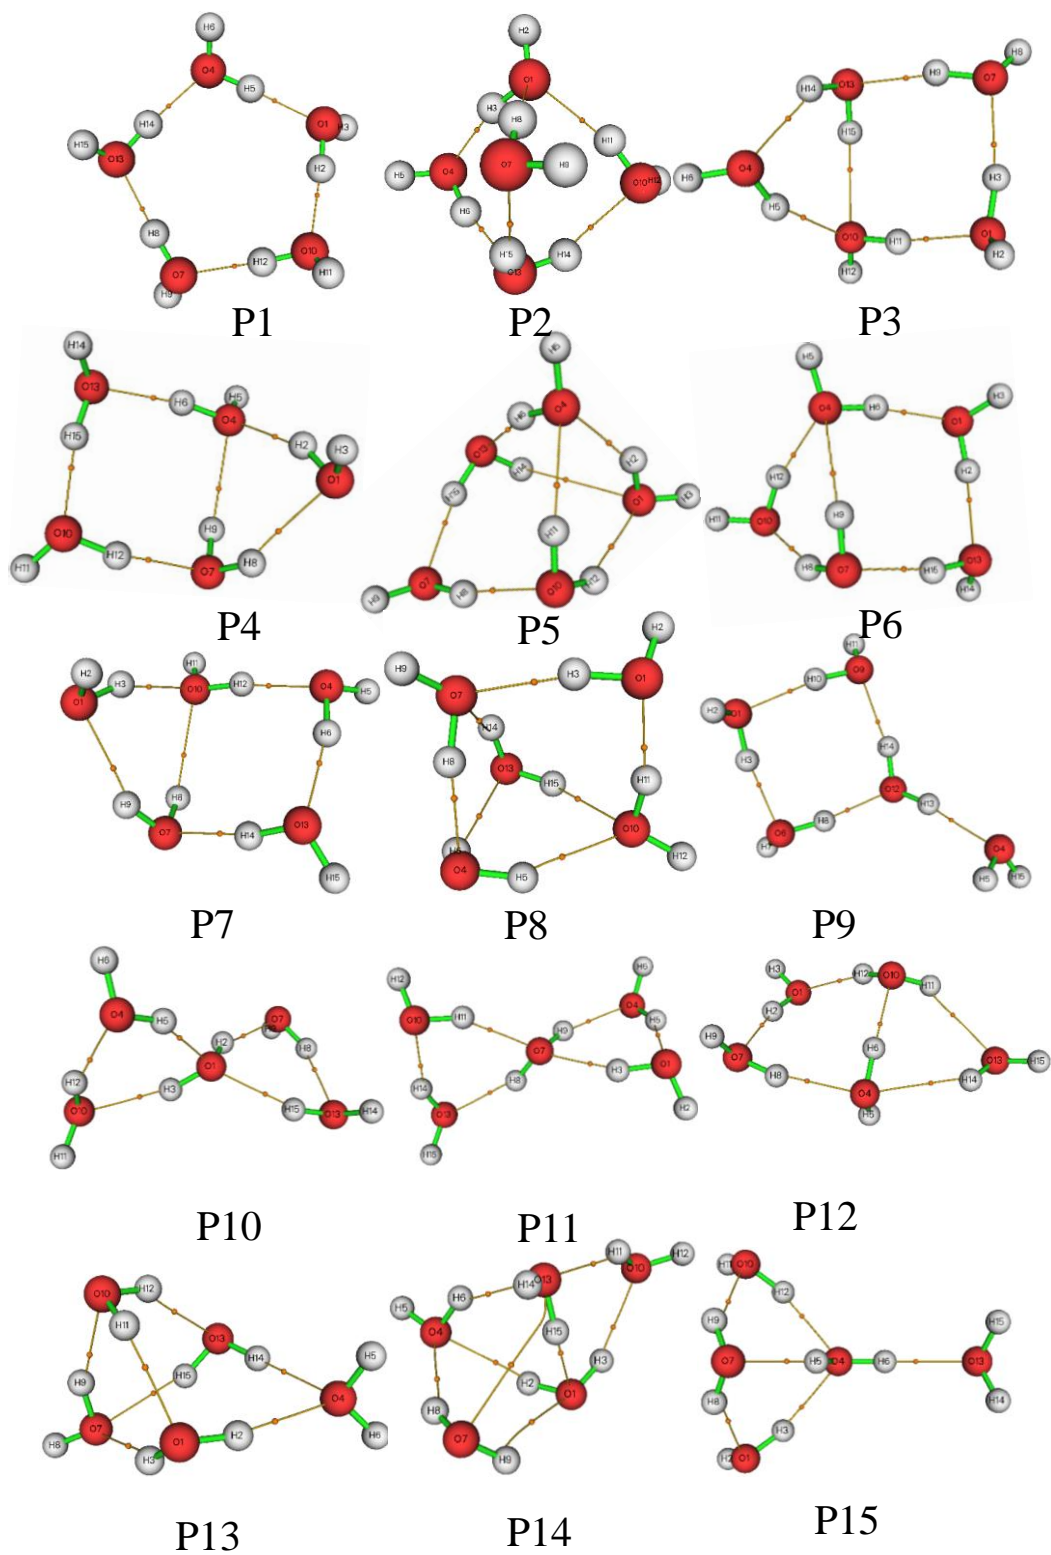

**Figure S2:** Molecular geometries of  $(\text{H}_2\text{O})_n$ ,  $n = 2-5$  cluster optimized at  $\omega\text{B97XD/aug-cc-pVDZ}$  level of theory.

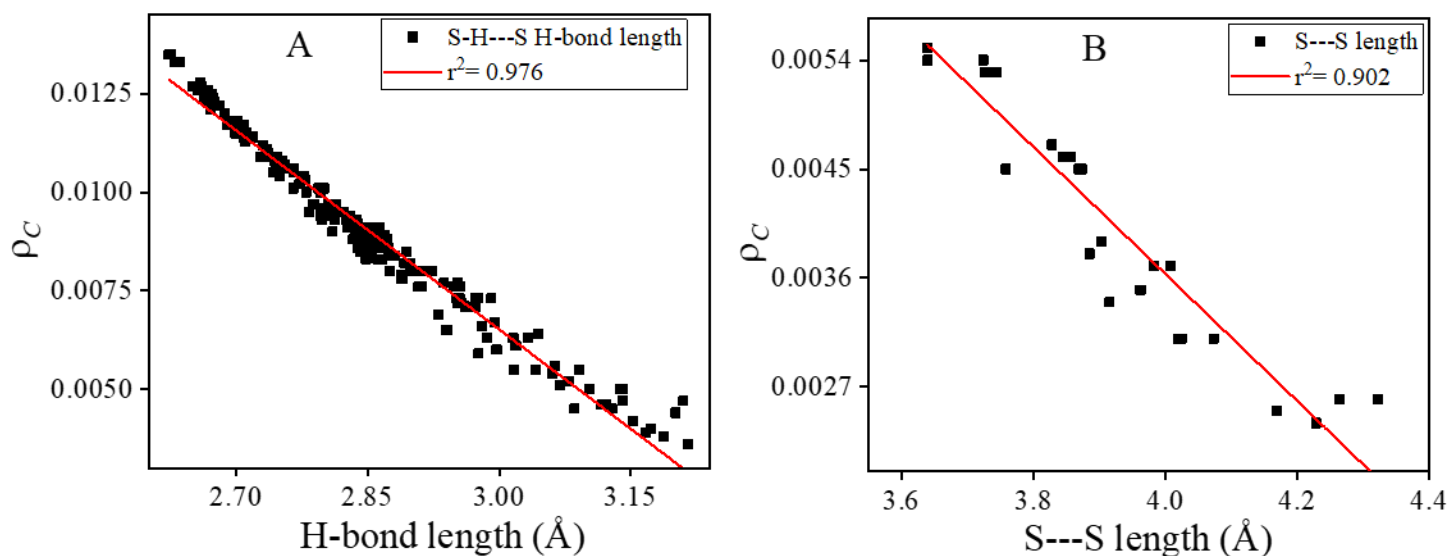

**Figure S3:** (A) H-bond length vs. charge density  $\rho_c$  (B) S---S bond length vs charge density  $\rho_c$  in  $(\text{H}_2\text{S})_n$   $n = 2-5$  cluster respectively.

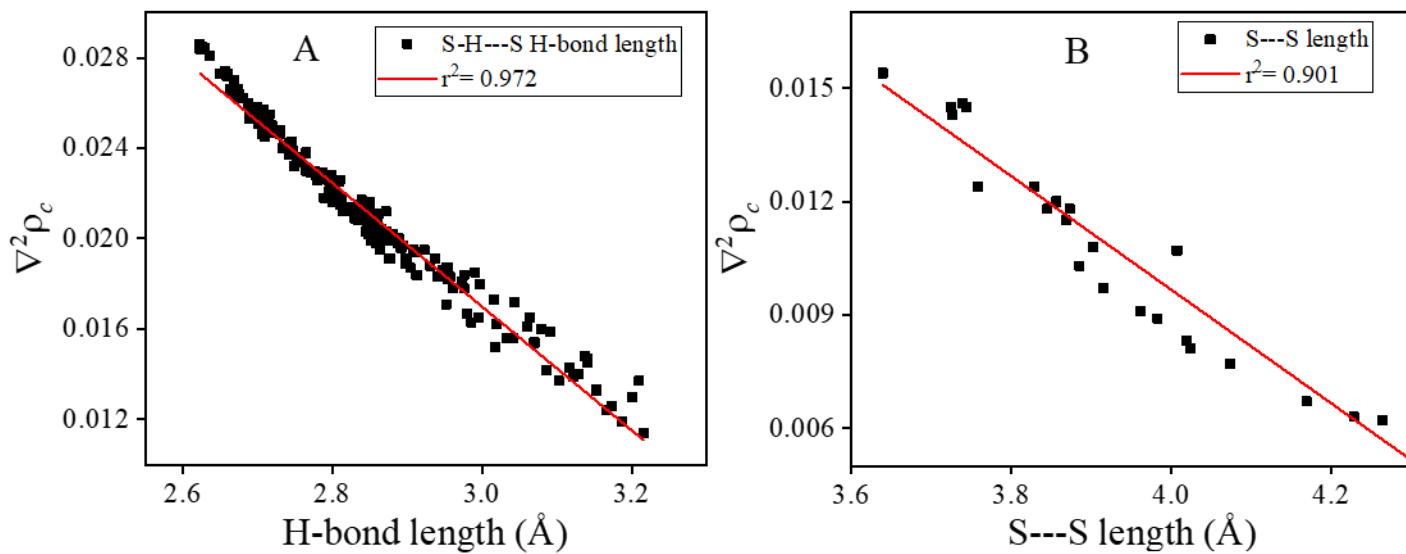

**Figure S4:** (A) H-bond length vs. Laplacian of charge density ( $\nabla^2\rho_c$ ) (B) S---S bond length vs Laplacian of charge density ( $\nabla^2\rho_c$ ) in  $(\text{H}_2\text{S})_n$   $n = 2-5$  cluster respectively.



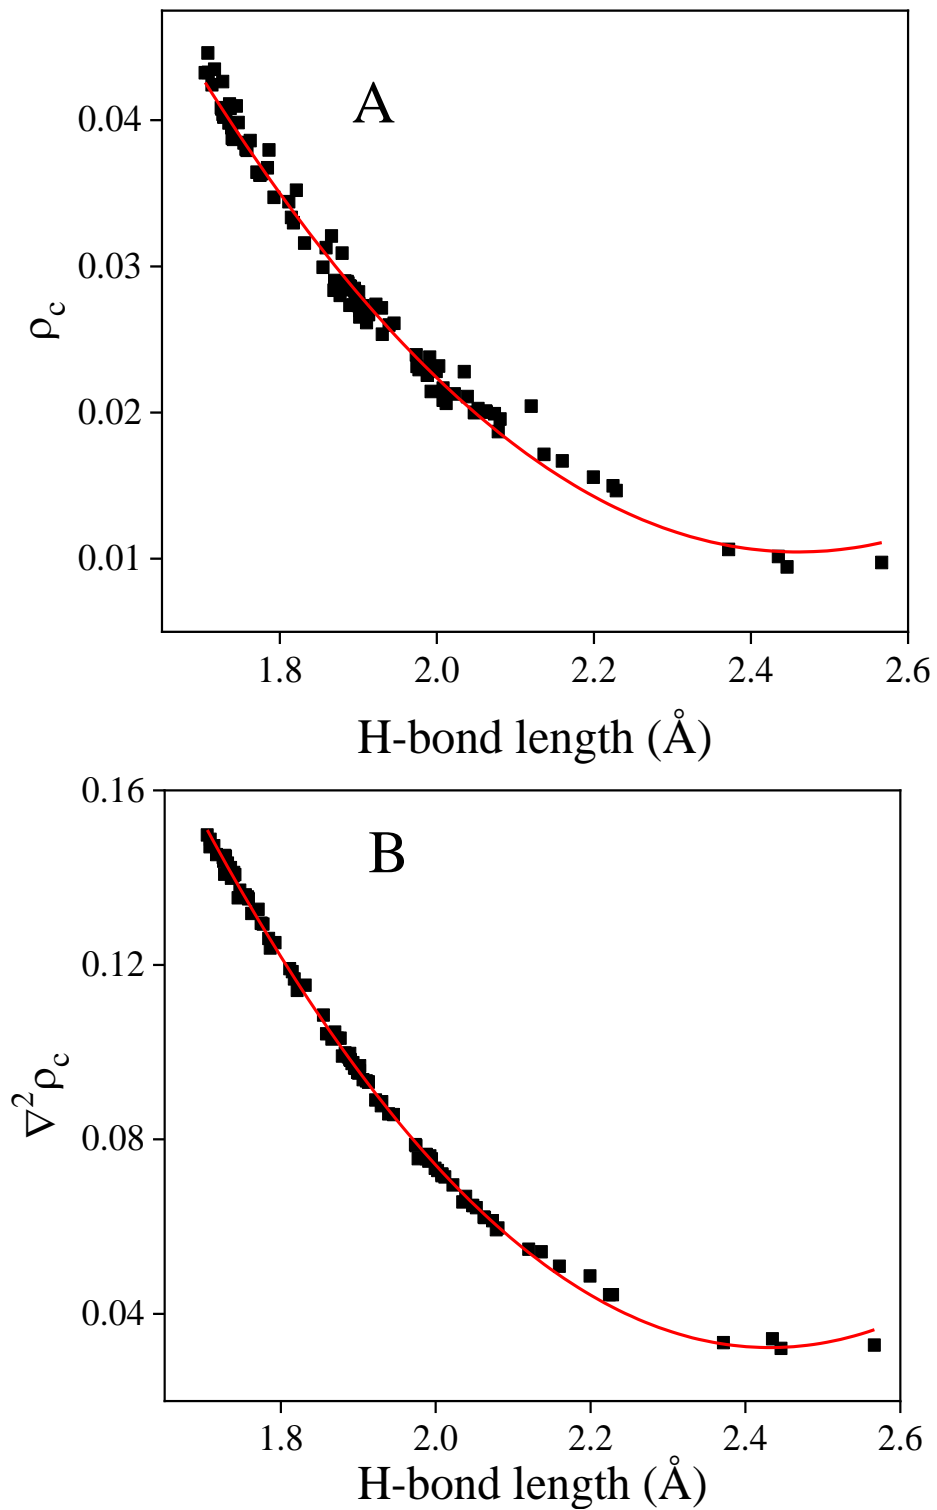

**Figure S5:** (A) H-bond length vs. charge density ( $\rho_c$ ) (B) H-bond length vs. Laplacian of charge density ( $\nabla^2 \rho_c$ ) in  $(\text{H}_2\text{O})_n$   $n = 2-5$  cluster respectively.

**TableS1:** H-bond length (Å), S---S distance (Å) and their corresponding value of  $\rho$  and  $\nabla^2\rho$  in dimers, trimers and tetramers calculated at  $\omega$ B97X-D/aug-cc-pV(D+d)Z level of theory

| Species | $\omega$ B97XD/aug-cc-pV(D+d)Z |            |          |          |                  |
|---------|--------------------------------|------------|----------|----------|------------------|
|         | S-H---S                        | S-H---S(Å) | S---S(Å) | $\rho_c$ | $\nabla^2\rho_c$ |
| D1      | S3-H2---S6                     | 2.772      |          | 0.0102   | 0.0229           |
| D2      | S1---S5                        |            | 3.739    | 0.0053   | 0.0146           |
| D3      | S1-H3---S4                     | 2.772      |          | 0.0102   | 0.0230           |
| Tr1     | S3-H1---S6                     | 2.745      |          | 0.0108   | 0.0238           |
|         | S5-H6---S9                     | 2.757      |          | 0.0106   | 0.0234           |
|         | S9-H8---S3                     | 2.746      |          | 0.0109   | 0.0238           |
| Tr2     | S3-H1---S6                     | 2.752      |          | 0.0107   | 0.0236           |
|         | S5-H6---S9                     | 2.754      |          | 0.0107   | 0.0235           |
|         | S9-H8---S3                     | 2.754      |          | 0.0107   | 0.0235           |
| Tr3     | S7-H9---S1                     | 2.780      |          | 0.0100   | 0.0226           |
|         | S1---S5                        |            | 3.724    | 0.0054   | 0.0145           |
| Tr4     | S4-H6---S7                     | 2.811      |          | 0.0094   | 0.0215           |
|         | S1-H2---S7                     | 2.811      |          | 0.0094   | 0.0215           |
| Tr5     | S1---S5                        |            | 3.743    | 0.0053   | 0.0145           |
|         | S1---S7                        |            | 3.743    | 0.0053   | 0.0145           |
| Tr6     | S9-H7---S1                     | 2.830      |          | 0.0091   | 0.0209           |
|         | S5-H2---S1                     | 2.812      |          | 0.0093   | 0.0215           |
| Te1     | S1-H6---S3                     | 2.743      |          | 0.0108   | 0.0239           |
|         | S2-H8---S1                     | 2.747      |          | 0.0108   | 0.0239           |
|         | S3-H9---S4                     | 2.711      |          | 0.0114   | 0.0255           |
|         | S4-H11---S2                    | 2.696      |          | 0.0118   | 0.0258           |
|         | S1-H5---S4                     | 3.167      |          | 0.0039   | 0.0124           |
|         | S2-H7---S3                     | 3.187      |          | 0.0038   | 0.0119           |
| Te2     | S2-H7---S1                     | 2.717      |          | 0.0114   | 0.0248           |
|         | S1-H5---S4                     | 2.705      |          | 0.0116   | 0.0251           |
|         | S4-H12---S3                    | 2.719      |          | 0.0114   | 0.0250           |
|         | S3-H9---S2                     | 2.673      |          | 0.0123   | 0.0266           |
|         | S1-H6---S3                     | 3.216      |          | 0.0036   | 0.0114           |
| Te3     | S4-H6---S7                     | 2.697      |          | 0.0117   | 0.0257           |
|         | S7-H8---S10                    | 2.709      |          | 0.0117   | 0.0252           |
|         | S10-H12---S1                   | 2.734      |          | 0.0110   | 0.0240           |
|         | S10-H11---S4                   | 3.173      |          | 0.0040   | 0.0126           |
|         | S1-H2---S4                     | 2.715      |          | 0.0114   | 0.0254           |
| Te4     | S3-H1---S12                    | 2.687      |          | 0.0120   | 0.0260           |
|         | S12-H10---S9                   | 2.680      |          | 0.0122   | 0.0262           |
|         | S9-H7---S6                     | 2.687      |          | 0.0120   | 0.0259           |
|         | S6-H4---S3                     | 2.681      |          | 0.0122   | 0.0262           |
| Te5     | S2-H7---S3                     | 2.833      |          | 0.0088   | 0.0211           |
|         | S3-H9---S1                     | 2.672      |          | 0.0124   | 0.0265           |
|         | S4-H12---S3                    | 2.888      |          | 0.0079   | 0.0198           |

|      |              |       |  |        |        |
|------|--------------|-------|--|--------|--------|
|      | S1-H5---S4   | 2.813 |  | 0.0097 | 0.0218 |
|      | S1-H6---S2   | 2.827 |  | 0.0094 | 0.0212 |
| Te6  | S4-H5---S10  | 2.834 |  | 0.0093 | 0.0211 |
|      | S1-H3---S4   | 2.669 |  | 0.0124 | 0.0266 |
|      | S10-H11---S1 | 2.846 |  | 0.0086 | 0.0208 |
|      | S7-H8---S1   | 2.847 |  | 0.0086 | 0.0208 |
|      | S4-H6---S7   | 2.837 |  | 0.0093 | 0.0211 |
| Te7  | S3-H10---S2  | 2.855 |  | 0.0084 | 0.0205 |
|      | S2-H8---S1   | 2.668 |  | 0.0124 | 0.0267 |
|      | S4-H12---S2  | 2.854 |  | 0.0084 | 0.0205 |
|      | S1-H5---S4   | 2.829 |  | 0.0094 | 0.0212 |
|      | S1-H6---S3   | 2.830 |  | 0.0094 | 0.0212 |
| Te8  | S3-H1---S12  | 2.675 |  | 0.0123 | 0.0264 |
|      | S12-H10---S9 | 2.675 |  | 0.0123 | 0.0264 |
|      | S9-H7---S6   | 2.675 |  | 0.0123 | 0.0264 |
|      | S6-H4---S3   | 2.675 |  | 0.0123 | 0.0264 |
| Te9  | S4-H6---S1   | 2.869 |  | 0.0089 | 0.0203 |
|      | S1-H3---S10  | 2.898 |  | 0.0080 | 0.0191 |
|      | S10-H11---S4 | 2.667 |  | 0.0124 | 0.0265 |
|      | S4-H5---S7   | 2.869 |  | 0.0089 | 0.0203 |
|      | S7-H8---S10  | 2.899 |  | 0.0080 | 0.0191 |
| Te10 | S10-H11---S4 | 2.822 |  | 0.0095 | 0.0214 |
|      | S10-H12---S7 | 2.861 |  | 0.0089 | 0.0207 |
|      | S1-H3---S7   | 3.201 |  | 0.0044 | 0.0130 |
|      | S1-H2---S10  | 2.690 |  | 0.0118 | 0.0254 |
|      | S4-H5---S1   | 2.834 |  | 0.0091 | 0.0208 |
| Te11 | S4-H6---S10  | 2.805 |  | 0.0096 | 0.0217 |
|      | S10-H12-S1   | 2.699 |  | 0.0118 | 0.0255 |
|      | S1-H2---S4   | 2.758 |  | 0.0106 | 0.0235 |
|      | S7-H9---S10  | 2.796 |  | 0.0096 | 0.0219 |

**TableS2:** H-bond length (Å), S---S distance (Å) and their corresponding value of  $\rho$  and  $\nabla^2\rho$  in pentamers calculated at  $\omega$ B97X-D/aug-cc-pV(D+d)Z level of theory

| Level of theory | $\omega$ B97XD/aug-cc-pV(D+d)Z |            |          |          |                  |
|-----------------|--------------------------------|------------|----------|----------|------------------|
| Species         | S-H---S                        | S-H---S(Å) | S---S(Å) | $\rho_c$ | $\nabla^2\rho_c$ |
| P1              | S13-H15---S7                   | 2.701      |          | 0.0118   | 0.0251           |
|                 | S7-H8---S10                    | 2.852      |          | 0.0090   | 0.0210           |
|                 | S10-H11---S13                  | 2.877      |          | 0.0084   | 0.0191           |
|                 | S4-H6---S1                     | 2.668      |          | 0.0124   | 0.0264           |
|                 | S1-H3---S10                    | 2.923      |          | 0.0080   | 0.0195           |
|                 | S1-H2---S13                    | 2.995      |          | 0.0067   | 0.0165           |
|                 | S10-H12---S4                   | 2.909      |          | 0.0080   | 0.0194           |
|                 | S7-H9---S4                     | 3.042      |          | 0.0055   | 0.0156           |
|                 | S13-H14---S4                   | 3.060      |          | 0.0054   | 0.0161           |
| P2              | S2-H9---S1                     | 2.713      |          | 0.0114   | 0.0249           |
|                 | S1-H7---S3                     | 2.904      |          | 0.0080   | 0.0187           |
|                 | S1-H6---S4                     | 2.973      |          | 0.0073   | 0.0181           |
|                 | S4-H13---S2                    | 2.809      |          | 0.0096   | 0.0225           |
|                 | S4-H12---S3                    | 2.952      |          | 0.0072   | 0.0171           |
|                 | S3-H11---S5                    | 2.679      |          | 0.0122   | 0.0262           |
|                 | S5-H15---S4                    | 2.806      |          | 0.0094   | 0.0218           |
|                 | S3-H10---S2                    | 3.138      |          | 0.0050   | 0.0148           |
|                 | S2---S5                        |            | 3.962    | 0.0035   | 0.0091           |
| P3              | S10-H12---S1                   | 2.861      |          | 0.0083   | 0.0200           |
|                 | S10-H11---S4                   | 2.953      |          | 0.0077   | 0.0187           |
|                 | S7-H8---S10                    | 2.674      |          | 0.0124   | 0.0262           |
|                 | S4-H5---S7                     | 2.854      |          | 0.0089   | 0.0199           |
|                 | S4-H6---S1                     | 2.858      |          | 0.0088   | 0.0198           |
|                 | S13-H15---S7                   | 2.861      |          | 0.0083   | 0.0200           |
|                 | S13-H14---S10                  | 2.955      |          | 0.0076   | 0.0187           |
|                 | S1-H2---S13                    | 2.674      |          | 0.0123   | 0.0262           |
| P4              | S7-H8---4                      | 2.846      |          | 0.0089   | 0.0207           |
|                 | S10-H11---S7                   | 2.663      |          | 0.0124   | 0.0266           |
|                 | S4-H6---S1                     | 2.707      |          | 0.0115   | 0.0246           |
|                 | S1-H2---S13                    | 2.850      |          | 0.0090   | 0.0216           |
|                 | S13-H14---S10                  | 2.742      |          | 0.0105   | 0.0237           |
|                 | S7-H9---S13                    | 2.937      |          | 0.0077   | 0.0191           |
|                 | S1-H3---S10                    | 3.019      |          | 0.0061   | 0.0162           |
|                 | S4---S10                       |            | 3.868    | 0.0045   | 0.0115           |
|                 | S13---S4                       |            | 4.228    | 0.0024   | 0.0063           |
| P5              | S7-H9---S13                    | 2.742      |          | 0.0109   | 0.0242           |
|                 | S13-H15---S10                  | 2.853      |          | 0.0085   | 0.0201           |
|                 | S10-H11---S7                   | 2.733      |          | 0.0110   | 0.0240           |

|     |               |       |       |        |        |
|-----|---------------|-------|-------|--------|--------|
|     | S10-H12---S4  | 2.839 |       | 0.0092 | 0.0217 |
|     | S4-H6---S1    | 2.711 |       | 0.0115 | 0.0252 |
|     | S1-H3---S10   | 2.841 |       | 0.0088 | 0.0209 |
|     | S7-H8---S4    | 3.141 |       | 0.0047 | 0.0147 |
|     | S13---S4      |       | 3.885 | 0.0038 | 0.0103 |
|     | S1---S7       |       | 3.983 | 0.0037 | 0.0089 |
| P6  | S7-H9---S13   | 2.875 |       | 0.0080 | 0.0200 |
|     | S7-H8---S10   | 2.976 |       | 0.0073 | 0.0184 |
|     | S1-H3---S7    | 2.707 |       | 0.0117 | 0.0262 |
|     | S1-H2---S13   | 3.079 |       | 0.0052 | 0.0199 |
|     | S13-H14---S4  | 2.690 |       | 0.0118 | 0.0198 |
|     | S4-H6---S10   | 2.872 |       | 0.0088 | 0.0200 |
|     | S10-H12---S1  | 2.827 |       | 0.0091 | 0.0187 |
|     | S4-H5---S1    | 3.033 |       | 0.0063 | 0.0262 |
| P7  | S7-H8---S10   | 2.752 |       | 0.0108 | 0.0207 |
|     | S10-H12---S1  | 2.961 |       | 0.0071 | 0.0266 |
|     | S1-H3---S7    | 2.898 |       | 0.0082 | 0.0246 |
|     | S4-H6---S1    | 2.801 |       | 0.0095 | 0.0216 |
|     | S1-H2---S13   | 2.864 |       | 0.0091 | 0.0237 |
|     | S13-H15---S7  | 2.875 |       | 0.0080 | 0.0191 |
|     | S7-H9---S4    | 3.044 |       | 0.0064 | 0.0162 |
|     | S10-H11---S4  | 3.064 |       | 0.0056 | 0.0115 |
|     | S13---S4      |       | 3.845 | 0.0046 | 0.0118 |
| P8  | S1-H3---S10   | 2.787 |       | 0.0097 | 0.0229 |
|     | S7-H8---S1    | 2.691 |       | 0.0118 | 0.0256 |
|     | S10-H12---S4  | 2.671 |       | 0.0121 | 0.0266 |
|     | S13-H15---S10 | 2.955 |       | 0.0073 | 0.0182 |
|     | S4-H6---S13   | 2.708 |       | 0.0115 | 0.0252 |
|     | S13-H14---S7  | 2.809 |       | 0.0096 | 0.0218 |
|     | S1---S4       |       | 4.073 | 0.0031 | 0.0077 |
|     | S7---S4       |       | 3.828 | 0.0047 | 0.0124 |
| P9  | S13-H14---S10 | 2.873 |       | 0.0085 | 0.0200 |
|     | S1-H3---S4    | 2.794 |       | 0.0101 | 0.0226 |
|     | S10-H11---S1  | 2.856 |       | 0.0086 | 0.0207 |
|     | S1-H2---S13   | 2.709 |       | 0.0116 | 0.0251 |
|     | S7-H8---S1    | 2.857 |       | 0.0086 | 0.0207 |
|     | S13-H15---S7  | 2.874 |       | 0.0085 | 0.0199 |
|     | S7---S4       |       | 3.639 | 0.0055 | 0.0154 |
|     | S13---S4      |       | 4.322 | 0.0026 | 0.0074 |
|     | S4---S10      |       | 3.639 | 0.0054 | 0.0154 |
| P10 | S4-H5---S7    | 2.986 |       | 0.0063 | 0.0163 |
|     | S4-H6---S13   | 3.070 |       | 0.0051 | 0.0154 |
|     | S1-H2---S4    | 2.862 |       | 0.0091 | 0.0211 |

|     |               |       |       |        |        |
|-----|---------------|-------|-------|--------|--------|
|     | S1-H3---S7    | 2.845 |       | 0.0091 | 0.0203 |
|     | S13-H14---S1  | 2.862 |       | 0.0086 | 0.0199 |
|     | S10-H12---S1  | 2.796 |       | 0.0094 | 0.0221 |
|     | S13-H15---S10 | 3.091 |       | 0.0055 | 0.0159 |
|     | S7-H8---S13   | 2.779 |       | 0.0103 | 0.0228 |
|     | S7-H9---S10   | 2.957 |       | 0.0072 | 0.0183 |
| P11 | S7-H8---S13   | 2.712 |       | 0.0115 | 0.0250 |
|     | S4-H5---S7    | 2.796 |       | 0.0100 | 0.0226 |
|     | S13-H15---S1  | 2.948 |       | 0.0076 | 0.0186 |
|     | S1-H2---S4    | 2.710 |       | 0.0113 | 0.0245 |
|     | S13-H14---S4  | 2.980 |       | 0.0066 | 0.0167 |
|     | S10-H12---S1  | 2.830 |       | 0.0092 | 0.0212 |
|     | S4-H6---S10   | 2.755 |       | 0.0107 | 0.0235 |
|     | S1-H3---S7    | 3.086 |       | 0.0045 | 0.0142 |
| P12 | S10-H12---S13 | 2.873 |       | 0.0086 | 0.0203 |
|     | S10-H11---S4  | 2.777 |       | 0.0104 | 0.0230 |
|     | S4-H6---S7    | 2.745 |       | 0.0106 | 0.0239 |
|     | S4-H5---S1    | 3.122 |       | 0.0046 | 0.0139 |
|     | S1-H3---S10   | 2.623 |       | 0.0135 | 0.0284 |
|     | S7-H9---S1    | 2.783 |       | 0.0095 | 0.0229 |
|     | S13-H15---S1  | 2.913 |       | 0.0080 | 0.0184 |
|     | S13-H14---S7  | 3.016 |       | 0.0063 | 0.0173 |
| P13 | S7-H9---S13   | 2.665 |       | 0.0124 | 0.0265 |
|     | S1-H2---S7    | 2.716 |       | 0.0114 | 0.0255 |
|     | S10-H12---S7  | 2.973 |       | 0.0071 | 0.0180 |
|     | S13-H15---S10 | 2.765 |       | 0.0105 | 0.0231 |
|     | S13-H14---S4  | 2.997 |       | 0.0060 | 0.0180 |
|     | S10-H11---S4  | 2.866 |       | 0.0083 | 0.0204 |
|     | S4-H5---S1    | 2.692 |       | 0.0118 | 0.0253 |
|     | S7---S4       |       | 4.169 | 0.0025 | 0.0067 |
| P14 | S13-H14---S7  | 2.660 |       | 0.0127 | 0.0273 |
|     | S10-H12---S13 | 2.668 |       | 0.0126 | 0.0270 |
|     | S7-H8---S1    | 2.699 |       | 0.0115 | 0.0253 |
|     | S1-H3---S10   | 2.940 |       | 0.0065 | 0.0183 |
|     | S1-H2---S4    | 2.826 |       | 0.0093 | 0.0212 |
|     | S4-H5---S10   | 2.810 |       | 0.0090 | 0.0226 |
|     | S13-H15---S4  | 3.141 |       | 0.0050 | 0.0145 |
|     | S7---S4       |       | 4.024 | 0.0031 | 0.0081 |
| P15 | S1-H2---S7    | 2.746 |       | 0.0105 | 0.0243 |
|     | S13-H15---S1  | 2.736 |       | 0.0110 | 0.0240 |
|     | S13-H14---S10 | 2.881 |       | 0.0084 | 0.0202 |
|     | S10-H12---S7  | 2.798 |       | 0.0093 | 0.0228 |
|     | S7-H8---S4    | 2.636 |       | 0.0133 | 0.0281 |

|          |               |       |        |        |        |
|----------|---------------|-------|--------|--------|--------|
|          | S4-H5---S13   | 2.672 |        | 0.0125 | 0.0265 |
|          | S4-H6---S10   | 3.117 |        | 0.0046 | 0.0143 |
| P16      | S13-H14---S7  | 2.908 |        | 0.0076 | 0.0195 |
|          | S1-H2---S13   | 2.774 |        | 0.0104 | 0.0229 |
|          | S7-H9---S1    | 2.789 |        | 0.0097 | 0.0218 |
|          | S1-H3---S4    | 2.800 |        | 0.0101 | 0.0222 |
|          | S4-H6---S7    | 2.892 |        | 0.0082 | 0.0196 |
|          | S4-H5---S10   | 2.951 |        | 0.0073 | 0.0183 |
|          | S10-H11---S1  | 2.765 |        | 0.0101 | 0.0230 |
|          | S7-H8---S10   | 3.210 |        | 0.0047 | 0.0137 |
| P17      | S7-H9---S10   | 2.912 |        | 0.0076 | 0.0184 |
|          | S1-H2---S7    | 2.718 |        | 0.0114 | 0.0247 |
|          | S7-H8---S4    | 2.954 |        | 0.0076 | 0.0185 |
|          | S4-H5---S1    | 2.814 |        | 0.0096 | 0.0212 |
|          | S4-H6---S10   | 2.894 |        | 0.0085 | 0.0197 |
|          | S10-H11---S13 | 2.735 |        | 0.0111 | 0.0241 |
|          | S13-H15---S4  | 2.805 |        | 0.0097 | 0.0220 |
|          | S10-H12---S1  | 3.017 |        | 0.0055 | 0.0152 |
| P18      | S7-H9---S4    | 2.730 |        | 0.0109 | 0.0248 |
|          | S1-H3---S7    | 2.735 |        | 0.0110 | 0.0240 |
|          | S1-H2---S13   | 2.869 |        | 0.0088 | 0.0202 |
|          | S10-H11---S1  | 2.629 |        | 0.0133 | 0.0284 |
|          | S13-H14---S10 | 3.153 |        | 0.0042 | 0.0133 |
|          | S4-H6---S10   | 2.656 |        | 0.0126 | 0.0274 |
| P19      | S13-H15---S4  | 2.838 |        | 0.0086 | 0.0214 |
|          | S4-H6---S7    | 2.848 |        | 0.0083 | 0.0202 |
|          | S1-H2---S4    | 2.850 |        | 0.0091 | 0.0213 |
|          | S7-H9---S1    | 2.650 |        | 0.0127 | 0.0273 |
|          | S1-H3---S10   | 2.860 |        | 0.0088 | 0.0200 |
|          | S10-H11---S13 | 2.730 |        | 0.0112 | 0.0246 |
|          | S13-H14---S7  | 2.780 |        | 0.0100 | 0.0229 |
|          | S4---S10      |       | 3.902  | 0.0039 | 0.0108 |
| S7---S10 |               | 3.758 | 0.0045 | 0.0124 |        |
| P20      | S1-H2-S10     | 2.699 |        | 0.0118 | 0.0258 |
|          | S10-H11---S7  | 2.747 |        | 0.0107 | 0.0238 |
|          | S7-H9---S13   | 2.701 |        | 0.0116 | 0.0252 |
|          | S13-H14---S4  | 2.836 |        | 0.0089 | 0.0215 |
|          | S4-H5---S1    | 2.690 |        | 0.0117 | 0.0256 |
|          | S1---S7       |       | 4.264  | 0.0026 | 0.0062 |
|          | S7---S4       |       | 3.856  | 0.0046 | 0.0120 |
|          | S4---S10      |       | 4.007  | 0.0037 | 0.0107 |
|          | S1---S13      |       | 3.873  | 0.0045 | 0.0118 |
| P21      | S13-H15---S7  | 2.864 |        | 0.0089 | 0.0203 |

|     |               |       |       |        |        |
|-----|---------------|-------|-------|--------|--------|
|     | S13-H14---S10 | 2.754 |       | 0.0106 | 0.0234 |
|     | S4-H5---S13   | 2.625 |       | 0.0135 | 0.0285 |
|     | S7-H9---S4    | 3.129 |       | 0.0045 | 0.0140 |
|     | S7-H8---S1    | 2.841 |       | 0.0085 | 0.0213 |
|     | S1-H2---S4    | 2.668 |       | 0.0123 | 0.0270 |
|     | S10-H11---S1  | 2.728 |       | 0.0109 | 0.0248 |
| P22 | S13-H14---S4  | 2.659 |       | 0.0128 | 0.0272 |
|     | S1-H2---S13   | 2.623 |       | 0.0135 | 0.0286 |
|     | S4-H6---S10   | 2.754 |       | 0.0106 | 0.0234 |
|     | S10-H12---S1  | 2.976 |       | 0.0059 | 0.0178 |
|     | S7-H8---S1    | 2.708 |       | 0.0114 | 0.0257 |
|     | S10-H11---S7  | 2.931 |       | 0.0069 | 0.0188 |
|     | S4-H5---S7    | 2.889 |       | 0.0078 | 0.0200 |
| P23 | S10-H11---S4  | 2.749 |       | 0.0104 | 0.0232 |
|     | S13-H15---S10 | 2.765 |       | 0.0106 | 0.0238 |
|     | S7-H8---S13   | 2.852 |       | 0.0088 | 0.0199 |
|     | S4-H6---S7    | 2.702 |       | 0.0116 | 0.0252 |
|     | S7-H9---S1    | 2.991 |       | 0.0073 | 0.0185 |
|     | S13-H14---S4  | 3.103 |       | 0.0050 | 0.0137 |
|     | S7---S10      |       | 4.019 | 0.0031 | 0.0083 |
|     | S1---S13      |       | 3.726 | 0.0053 | 0.0143 |
|     | S1---S4       |       | 3.915 | 0.0034 | 0.0097 |



**Table S3:** H-bond length ( $\text{\AA}$ ) and their corresponding value of  $\rho$  and  $\nabla^2\rho$  in dimers, trimers and tetramers calculated at  $\omega\text{B97X-D/aug-cc-pVDZ}$  level of theory

| Species | $\omega\text{B97XD/aug-cc-pVDZ}$ |                             |          |                  |
|---------|----------------------------------|-----------------------------|----------|------------------|
|         | O-H---O                          | O-H--<br>-O( $\text{\AA}$ ) | $\rho_c$ | $\nabla^2\rho_c$ |
| Dimer   | O4-H5---O1                       | 1.93                        | 0.0254   | 0.0886           |
| Tr1     | O7-H8---O4                       | 1.91                        | 0.0273   | 0.0937           |
|         | O4-H5---O1                       | 1.89                        | 0.0290   | 0.0993           |
|         | O1-H3---O7                       | 1.89                        | 0.0288   | 0.0994           |
| Tr2     | O7-H9---O4                       | 1.90                        | 0.0273   | 0.0952           |
|         | O1-H2---O7                       | 1.90                        | 0.0274   | 0.0956           |
|         | O4-H5---O1                       | 1.90                        | 0.0273   | 0.0953           |
| Tr3     | O4-H6---O7                       | 1.97                        | 0.0232   | 0.0785           |
|         | O1-H3---O7                       | 1.97                        | 0.0232   | 0.0785           |
| Tr4     | O4-H6---O7                       | 1.98                        | 0.0229   | 0.0756           |
|         | O4-H5---O1                       | 1.99                        | 0.0229   | 0.0755           |
| Te1     | O4-H6---O10                      | 1.76                        | 0.0379   | 0.1351           |
|         | O10-H12---O7                     | 1.76                        | 0.0379   | 0.1351           |
|         | O7-H9---O1                       | 1.76                        | 0.0379   | 0.1351           |
|         | O1-H2---O4                       | 1.76                        | 0.0379   | 0.1351           |
| Te2     | O4-H5---O1                       | 1.77                        | 0.0362   | 0.1295           |
|         | O1-H2---O7                       | 1.76                        | 0.0380   | 0.1355           |
|         | O7-H9---O10                      | 1.77                        | 0.0362   | 0.1295           |
|         | O10-H12---O4                     | 1.76                        | 0.0380   | 0.1355           |
| Te3     | O1-H2---O10                      | 2.05                        | 0.0203   | 0.0643           |
|         | O1-H3---O7                       | 2.05                        | 0.0203   | 0.0643           |
|         | O7-H8---O4                       | 1.99                        | 0.0226   | 0.0765           |
|         | O4-H6---O1                       | 1.79                        | 0.0380   | 0.1239           |
|         | O10-H11---O4                     | 1.99                        | 0.0226   | 0.0765           |
| Te4     | O7-H9---O1                       | 1.90                        | 0.0285   | 0.0964           |
|         | O1-H3---O4                       | 1.81                        | 0.0344   | 0.1191           |
|         | O4-H5---O7                       | 2.00                        | 0.0228   | 0.0734           |
|         | O4-H6---O10                      | 1.90                        | 0.0265   | 0.0957           |
| Te5     | O10-H12---O4                     | 2.01                        | 0.0206   | 0.0713           |
|         | O10-H11---O1                     | 2.01                        | 0.0206   | 0.0713           |
|         | O7-H9---O4                       | 2.01                        | 0.0206   | 0.0713           |
|         | O7-H8---O1                       | 2.01                        | 0.0206   | 0.0713           |

**Table S4:** H-bond length ( $\text{\AA}$ ) and their corresponding value of  $\rho$  and  $\nabla^2\rho$  in pentamers calculated at  $\omega\text{B97X-D/aug-cc-pVDZ}$  level of theory

| $\omega\text{B97XD/aug-cc-pVDZ}$ |               |                             |          |                  |
|----------------------------------|---------------|-----------------------------|----------|------------------|
| Species                          | O-H---O       | O-H---<br>O( $\text{\AA}$ ) | $\rho_c$ | $\nabla^2\rho_c$ |
| P1                               | O4-H5---O1    | 1.73                        | 0.0403   | 0.1445           |
|                                  | O1-H2---O10   | 1.73                        | 0.0402   | 0.1449           |
|                                  | O10-H12---O7  | 1.73                        | 0.0404   | 0.1451           |
|                                  | O7-H8---O13   | 1.73                        | 0.0403   | 0.1448           |
|                                  | O13-H14---O4  | 1.74                        | 0.0388   | 0.1412           |
| P2                               | O7-H8---O1    | 1.89                        | 0.0273   | 0.0976           |
|                                  | O10-H11---O1  | 1.87                        | 0.0285   | 0.1032           |
|                                  | O13-H15---O7  | 1.92                        | 0.0274   | 0.0890           |
|                                  | O4-H6---O13   | 1.73                        | 0.0426   | 0.1408           |
|                                  | O1-H3---O4    | 1.70                        | 0.0432   | 0.1498           |
|                                  | O13-H14---O10 | 1.94                        | 0.0260   | 0.0858           |
| P3                               | O1-H3---O7    | 1.74                        | 0.0398   | 0.1423           |
|                                  | O7-H9---O13   | 1.75                        | 0.0398   | 0.1371           |
|                                  | O13-H15---O10 | 2.04                        | 0.0211   | 0.0669           |
|                                  | O10-H11---O1  | 1.71                        | 0.0424   | 0.1473           |
|                                  | O13-H14---O4  | 2.00                        | 0.0232   | 0.0728           |
|                                  | O4-H5---O10   | 1.89                        | 0.0273   | 0.0997           |
| P4                               | O13-H15---O10 | 1.73                        | 0.0402   | 0.1433           |
|                                  | O10-H12---O7  | 1.74                        | 0.0408   | 0.1401           |
|                                  | O7-H9---O4    | 2.07                        | 0.0199   | 0.0613           |
|                                  | O4-H6---O13   | 1.73                        | 0.0409   | 0.1446           |
|                                  | O7-H8---O1    | 1.99                        | 0.0238   | 0.0750           |
|                                  | O1-H2---O4    | 1.88                        | 0.0280   | 0.1032           |
| P5                               | O10-H11---O4  | 2.02                        | 0.0213   | 0.0695           |
|                                  | O4-H6---O13   | 1.72                        | 0.0435   | 0.1453           |
|                                  | O13-H15---O7  | 1.79                        | 0.0347   | 0.1251           |
|                                  | O7-H8---O10   | 1.78                        | 0.0367   | 0.1260           |
|                                  | O1-H2---O4    | 1.90                        | 0.0270   | 0.0968           |
|                                  | O13-H14---O1  | 2.45                        | 0.0094   | 0.0321           |
|                                  | O10-H12---O1  | 2.08                        | 0.0196   | 0.0597           |
| P6                               | O13-H15---O7  | 1.76                        | 0.0386   | 0.1318           |
|                                  | O7-H9---O4    | 2.23                        | 0.0147   | 0.0443           |
|                                  | O4-H6---O1    | 1.73                        | 0.0408   | 0.1438           |

|     |               |      |        |        |
|-----|---------------|------|--------|--------|
|     | O1-H2---O13   | 1.73 | 0.0406 | 0.1431 |
|     | O7-H8---O10   | 1.90 | 0.0282 | 0.0954 |
|     | O10-H12---O4  | 1.86 | 0.0299 | 0.1085 |
| P7  | O13-H14---O7  | 1.74 | 0.0411 | 0.1399 |
|     | O7-H8---O10   | 2.16 | 0.0167 | 0.0509 |
|     | O10-H12---O4  | 1.74 | 0.0395 | 0.1404 |
|     | O4-H6---O13   | 1.74 | 0.0387 | 0.1407 |
|     | O1-H3---O10   | 1.87 | 0.0290 | 0.1046 |
|     | O7-H9---O1    | 1.93 | 0.0272 | 0.0877 |
| P8  | O4-H5---O10   | 1.99 | 0.0229 | 0.0755 |
|     | O10-H11---O1  | 1.75 | 0.0384 | 0.1360 |
|     | O1-H3---O7    | 1.77 | 0.0364 | 0.1327 |
|     | O7-H8---O4    | 1.74 | 0.0410 | 0.1354 |
|     | O4-H6---O13   | 2.12 | 0.0204 | 0.0548 |
|     | O13-H14---O7  | 2.37 | 0.0106 | 0.0334 |
|     | O13-H15---O10 | 2.01 | 0.0217 | 0.0716 |
| P9  | O1-H3---O6    | 1.76 | 0.0385 | 0.1355 |
|     | O6-H8---O12   | 1.71 | 0.0433 | 0.1488 |
|     | O12-H14---O9  | 1.81 | 0.0333 | 0.1184 |
|     | O9-H10---O1   | 1.78 | 0.0363 | 0.1294 |
|     | O12-H13---O4  | 1.91 | 0.0262 | 0.0934 |
| P10 | O1-H3---O10   | 1.88 | 0.0290 | 0.0998 |
|     | O10-H12---O4  | 1.89 | 0.0286 | 0.0981 |
|     | O4-H5---O1    | 1.90 | 0.0283 | 0.0964 |
|     | O1-H2---O7    | 1.89 | 0.0284 | 0.0974 |
|     | O7-H8---O13   | 1.89 | 0.0287 | 0.0984 |
|     | O13-H15---O1  | 1.89 | 0.0288 | 0.0989 |
| P11 | O7-H8---O13   | 1.89 | 0.0285 | 0.0982 |
|     | O13-H14---O10 | 1.89 | 0.0288 | 0.0993 |
|     | O10-H11---O7  | 1.90 | 0.0281 | 0.0963 |
|     | O7-H9---O4    | 1.89 | 0.0285 | 0.0982 |
|     | O4-H5---O1    | 1.89 | 0.0288 | 0.0993 |
|     | O1-H3---O7    | 1.90 | 0.0281 | 0.0963 |
| P12 | O7-H8---O4    | 1.86 | 0.0313 | 0.1042 |
|     | O4-H6---O10   | 1.71 | 0.0446 | 0.1470 |
|     | O10-H12---O1  | 1.83 | 0.0316 | 0.1153 |
|     | O1-H2---O7    | 1.82 | 0.0330 | 0.1167 |
|     | O10-H11---O13 | 2.20 | 0.0156 | 0.0487 |
|     | O13-H14---O4  | 2.22 | 0.0150 | 0.0444 |
| P13 | O13-H14---O4  | 2.01 | 0.0208 | 0.0720 |

|     |               |      |        |        |
|-----|---------------|------|--------|--------|
|     | O13-H15---O7  | 2.05 | 0.0200 | 0.0648 |
|     | O1-H3---O7    | 2.05 | 0.0200 | 0.0648 |
|     | O1-H2---O4    | 2.01 | 0.0209 | 0.0720 |
|     | O10-H11---O1  | 2.03 | 0.0228 | 0.0656 |
|     | O10-H12---O13 | 2.04 | 0.0228 | 0.0656 |
|     | O7-H9---O10   | 1.82 | 0.0352 | 0.1141 |
| P14 | O1-H3---O10   | 1.97 | 0.0239 | 0.0788 |
|     | O1-H2---O4    | 2.14 | 0.0171 | 0.0542 |
|     | O10-H11---O13 | 1.99 | 0.0214 | 0.0762 |
|     | O13-H15---O1  | 1.88 | 0.0309 | 0.0991 |
|     | O4-H6---O13   | 1.95 | 0.0261 | 0.0857 |
|     | O7-H8---O4    | 2.08 | 0.0187 | 0.0593 |
|     | O7-H9---O1    | 2.43 | 0.0102 | 0.0342 |
|     | O13-H15---O7  | 2.57 | 0.0097 | 0.0328 |
| P15 | O7-H9---O10   | 2.06 | 0.0201 | 0.0622 |
|     | O7-H8---O1    | 2.06 | 0.0200 | 0.0620 |
|     | O1-H3---O4    | 1.91 | 0.0267 | 0.0931 |
|     | O4-H5---O7    | 1.87 | 0.0321 | 0.1030 |
|     | O10-H12---O4  | 1.91 | 0.0267 | 0.0931 |
|     | O4-H6---O13   | 1.87 | 0.0284 | 0.1039 |

**Table S5:** Geometry and frequencies of  $(\text{H}_2\text{S})_n$   $n = 2-5$  clusters optimized at  $\omega\text{B97X-D/aug-cc-pV(D+d)Z}$  level of theory

| Species | Geometry                                                                                                                                                                                                                                                                                                                              | Frequency                                                                                                                                                                                             |
|---------|---------------------------------------------------------------------------------------------------------------------------------------------------------------------------------------------------------------------------------------------------------------------------------------------------------------------------------------|-------------------------------------------------------------------------------------------------------------------------------------------------------------------------------------------------------|
| Monomer | H0.000000000.97376600-0.82750000<br>H0.000000000-0.97376600-0.82750000<br>S0.000000000.000000000.10343800                                                                                                                                                                                                                             | 1197.82222747.27052763.3579                                                                                                                                                                           |
| Dimer   | H2.327465001.23946600-0.01282900<br>H0.747542000.08978300-0.02271700<br>S2.08791200-0.086348000.00127300<br>H-2.02738800-0.767974001.02095800<br>H-2.06553700-0.87714700-0.92599400<br>S-2.024292000.10609000-0.00498700                                                                                                              | 46.616463.583987.5946<br>109.3311183.7616296.9873<br>1200.76241203.33272679.8299<br>2735.94832754.23912754.3388                                                                                       |
| Dimer2  | S-0.00963300-1.923768000.00000000<br>H1.213879001.252077000.00000000<br>H-0.69290500-1.289909000.97399500<br>H-0.69290500-1.28990900-0.97399500<br>S-0.009633001.814861000.00000000<br>H0.480202003.070253000.00000000                                                                                                                | 70.9427115.5163126.8843<br>153.9528192.6187246.6297<br>1194.39071201.98802731.9153<br>2736.78122747.93852756.4494                                                                                     |
| Dimer3  | S0.087901002.104440000.00000000<br>H-1.259148002.138032000.00000000<br>H0.117688000.752620000.00000000<br>S0.08790100-2.018734000.00000000<br>H-0.83567900-2.130973000.97499000<br>H-0.83567900-2.13097300-0.97499000                                                                                                                 | 64.908073.839997.2351<br>109.9509176.7771303.8155<br>1198.97831205.05882680.4524<br>2730.13992745.53942746.8328                                                                                       |
| Trimer2 | H1.261510001.04614400-0.08653200<br>H0.696205002.336445001.26991800<br>S0.642655002.25019500-0.07397700<br>H1.68326700-1.770915001.26930000<br>H0.27613900-1.61518900-0.08005000<br>S1.62828600-1.68123000-0.07428700<br>H-2.37633800-0.567942001.26938300<br>H-1.539130000.57002100-0.08283600<br>S-2.27104400-0.56887600-0.07418400 | 66.910768.142485.0257<br>88.223289.7938113.6768<br>183.8040188.1253196.8591<br>244.7958255.3741407.6221<br>1204.04541204.63251205.5839<br>2658.99812668.30262670.7886<br>2745.50432747.83072748.5394  |
| Trimer1 | H1.132100001.17311400-0.00407900<br>H0.413611002.50319800-1.24605100<br>S0.386961002.299930000.08595500<br>H1.89858400-1.565950001.26325900<br>H0.45747500-1.57998100-0.05984200<br>S1.80779000-1.48630300-0.07907200<br>H-2.37012900-0.869358001.25355800<br>H-1.584698000.39174700-0.01817900<br>S-2.19143400-0.81692500-0.08117400 | 67.956072.179683.8325<br>89.9615105.8416122.7169<br>189.7815192.8916204.6958<br>251.0979264.6766413.1805<br>1204.77331205.23291205.7166<br>2657.20512667.30512668.1537<br>2743.34152748.30012748.5809 |
| Trimer3 | S0.000000000.860792000.00000000<br>H-3.482392001.266034000.00000000<br>H-0.427272000.033492000.97518500<br>H-0.427272000.03349200-0.97518500<br>S-3.60490600-0.075200000.00000000<br>H-4.95170100-0.029837000.00000000<br>S3.75038600-0.869791000.00000000                                                                            | 12.268250.428457.9427<br>74.540278.157796.0785<br>98.4548125.5975127.5475<br>199.6802200.4087307.8980<br>1196.10301202.28601204.5591<br>2684.93412732.45022737.6468<br>2748.83432755.54662757.1845    |

|           |                                                                                                                                                                                                                                                                                                                                                                                                                                                    |                                                                                                                                                                                                                                                                                           |
|-----------|----------------------------------------------------------------------------------------------------------------------------------------------------------------------------------------------------------------------------------------------------------------------------------------------------------------------------------------------------------------------------------------------------------------------------------------------------|-------------------------------------------------------------------------------------------------------------------------------------------------------------------------------------------------------------------------------------------------------------------------------------------|
|           | H4.416020000.301773000.00000000<br>H2.54493900-0.257766000.00000000                                                                                                                                                                                                                                                                                                                                                                                |                                                                                                                                                                                                                                                                                           |
| Trimer4   | S-4.152344000.025250000.00983200<br>H-2.80807200-0.10970700-0.01482400<br>H-4.35123000-1.30714500-0.01578700<br>S4.152395000.025243000.00977400<br>H4.35096000-1.30721700-0.01493200<br>H2.80809100-0.10941100-0.01476300<br>S-0.000007000.00942500-0.02045900<br>H-0.000259000.877046001.01107200<br>H-0.000185000.99772900-0.93711700                                                                                                            | 4.096215.281946.2679<br>50.036368.283968.7736<br>85.4656111.1947116.9505<br>221.9073248.0373317.3918<br>1199.57651201.61261202.7658<br>2692.72162695.32032733.0584<br>2750.58982750.68392752.5513                                                                                         |
| Trimer5   | S0.000000000.000000001.50333700<br>H-0.062263003.256789000.56409600<br>H-0.97473500-0.005986000.57147700<br>H0.974735000.005986000.57147700<br>S0.000000002.98547600-0.75365100<br>H-0.057639004.28559100-1.10385700<br>S0.00000000-2.98547600-0.75365100<br>H0.05763900-4.28559100-1.10385700<br>H0.06226300-3.256789000.56409600                                                                                                                 | 12.276358.041263.0146<br>68.1992105.9132114.2198<br>114.8737136.7460144.2434<br>183.4741200.2084255.4760<br>1194.08611196.54131201.9100<br>2737.54372737.75212738.0080<br>2753.45442757.38562757.6253                                                                                     |
| Trimer6   | S0.00012200-0.15910500-0.15082000<br>H-2.80591500-0.154688000.03688700<br>H-0.088117000.98082100-0.86468800<br>H0.143517000.506395001.01276800<br>S-4.128744000.112930000.10215200<br>H-4.46062700-1.06250400-0.46671000<br>S4.13818500-0.024761000.11841000<br>H4.228175001.06738500-0.66575800<br>H2.82995700-0.20243500-0.16838000                                                                                                              | 12.554618.416446.6402<br>57.757673.615180.5060<br>99.5188109.4784150.7958<br>198.7109271.0220310.8336<br>1199.17741203.69041204.7343<br>2697.25702701.12882729.6591<br>2746.21182746.51072749.7248                                                                                        |
| Tetramer1 | S0.48821300-2.121409001.27345200<br>S2.037684000.46323100-1.41606900<br>S-2.04534300-0.33870300-1.33970900<br>S-0.320815001.911316001.46632800<br>H0.16615100-1.143815002.14438900<br>H-0.49847500-1.770042000.41639100<br>H1.002939000.05993300-2.18062000<br>H1.83062300-0.52235900-0.51162500<br>H-1.804326000.55944400-0.35652700<br>H-3.22708100-0.71556200-0.81383300<br>H0.561347001.721097000.45663400<br>H-0.587005003.180336001.10115600 | 24.287932.682060.8499<br>70.959081.644183.0447<br>97.4076102.1999131.1230<br>134.0872150.7250161.1638<br>178.2428202.1503311.5123<br>330.9482354.2125382.0626<br>1198.84921200.06251204.4997<br>1206.39712656.16582668.2362<br>2672.18322678.80092738.1738<br>2744.33272750.35192751.7917 |
| Tetramer2 | S-0.08586500-2.134911001.16872200<br>S2.40600700-0.08530400-1.25803300<br>S0.107765002.008038001.23425900<br>S-2.424548000.08355600-1.24695900<br>H-0.97719700-1.594210000.30439200<br>H-0.19022000-1.096110002.02188300<br>H1.73207600-0.96015900-0.47409900<br>H3.46563100-0.05553800-0.42572600<br>H0.985466001.545849000.31184400                                                                                                              | 8.322728.902567.9983<br>80.405987.640893.6559<br>107.2338124.2140129.8063<br>139.7343144.6453160.1849<br>169.4022184.2954314.9664<br>337.8759348.1125396.0470<br>1200.11191202.02571205.0646<br>1206.09802651.05552656.7385<br>2667.61752674.58832741.2732                                |

|           |                                                                                                                                                                                                                                                                                                                                                                                                                                                     |                                                                                                                                                                                                                                                                                            |
|-----------|-----------------------------------------------------------------------------------------------------------------------------------------------------------------------------------------------------------------------------------------------------------------------------------------------------------------------------------------------------------------------------------------------------------------------------------------------------|--------------------------------------------------------------------------------------------------------------------------------------------------------------------------------------------------------------------------------------------------------------------------------------------|
|           | H0.119933003.259209000.73503700<br>H-3.456768000.01959800-0.38258200<br>H-1.732645000.93929700-0.45857000                                                                                                                                                                                                                                                                                                                                           | 2743.08272746.58342746.7934                                                                                                                                                                                                                                                                |
| Tetramer3 | S2.546755000.008258001.15194600<br>H1.85552200-0.905107000.43058300<br>H1.69705100-0.078608002.19429200<br>S0.00185300-1.95217500-1.25477900<br>H-0.09911400-3.25888700-0.94386700<br>H-0.94570700-1.58197800-0.36167900<br>S-2.51477000-0.027838001.18549800<br>H-1.850057000.856742000.40392700<br>H-1.629916000.103590002.19337200<br>S-0.036956002.10642600-1.17343200<br>H0.080061001.11147800-2.07577900<br>H0.942036001.59804800-0.38858600  | 17.683138.060567.2744<br>79.338984.995993.6544<br>100.0353113.2571125.4852<br>146.3277155.5336169.8396<br>174.9257216.8319310.9506<br>328.7951357.9407382.8100<br>1199.48441202.26771207.1131<br>1208.01372648.88872657.8384<br>2661.05182667.09722735.7315<br>2745.98042746.59852750.7601 |
| Tetramer4 | H-1.73652100-1.110323000.24470200<br>H-3.41239300-0.28891000-0.34549700<br>S-2.63083300-0.226947000.75069900<br>H-1.110030001.73609000-0.24405300<br>H-0.289137003.412590000.34512300<br>S-0.227013002.63043200-0.75063600<br>H1.736226001.109758000.24408100<br>H3.412721000.28907400-0.34539200<br>S2.630864000.226996000.75058600<br>H1.10994900-1.73587500-0.24447400<br>H0.28996200-3.412679000.34504700<br>S0.22693300-2.63046300-0.75062000  | -4.066122.188675.0155<br>81.724582.892083.2099<br>103.1594108.7919110.0209<br>116.6334197.6984200.0522<br>204.3407213.2779231.6347<br>325.8345336.4471433.9344<br>1202.05981203.58821204.9680<br>1207.66512631.38152640.0004<br>2649.38402651.60132743.8297<br>2744.48422746.09692747.3402 |
| Tetramer5 | S0.029085001.989216001.06009300<br>S2.92199300-0.00257000-1.06913000<br>S-0.05124200-1.959582000.89868800<br>S-2.983861000.08088100-0.96643200<br>H-0.997831001.664863000.24191900<br>H0.960611001.630393000.14770600<br>H2.27846200-0.96440000-0.37108400<br>H3.748577000.27968700-0.04277900<br>H-0.02584600-0.669687001.31384100<br>H0.12468200-2.448848002.14140900<br>H-2.22752400-0.30048000-2.01485700<br>H-2.51672600-0.91863600-0.18767000 | 12.486642.847560.1525<br>64.432869.051875.7001<br>92.532998.7158107.8188<br>140.8105150.3466162.1997<br>215.6414233.1090251.9784<br>261.2896334.7233419.5337<br>1197.16351201.55561203.4086<br>1207.58082645.24542671.3529<br>2689.01952691.87412702.0845<br>2741.94782745.42222748.9049   |
| Tetramer6 | S0.00237700-1.93518200-0.88629200<br>H-0.00231900-2.40918700-2.14725900<br>H0.00283400-0.63974300-1.28510200<br>S-0.002139002.01357400-0.99723600<br>H-0.985955001.65938600-0.13976900<br>H0.978465001.66092300-0.13552900<br>S3.050471000.033873000.91563000<br>H2.43429500-0.936677000.20571000<br>H2.45539200-0.342697002.06461400<br>S-3.050865000.030508000.91571400<br>H-2.42792800-0.936847000.20728300                                      | 15.710949.756859.6437<br>66.077570.859793.3726<br>95.0313112.9387122.8030<br>146.7360156.3509181.2451<br>218.9896229.5221256.0944<br>267.1346329.8234422.7132<br>1197.47511202.18881203.9145<br>1208.82252645.32472679.7858<br>2692.86722701.57292704.2182<br>2744.41972745.36042746.4499  |

|            |                                                                                                                                                                                                                                                                                                                                                                                                                                                     |                                                                                                                                                                                                                                                                                            |
|------------|-----------------------------------------------------------------------------------------------------------------------------------------------------------------------------------------------------------------------------------------------------------------------------------------------------------------------------------------------------------------------------------------------------------------------------------------------------|--------------------------------------------------------------------------------------------------------------------------------------------------------------------------------------------------------------------------------------------------------------------------------------------|
|            | H-2.45229800-0.339514002.06500600                                                                                                                                                                                                                                                                                                                                                                                                                   |                                                                                                                                                                                                                                                                                            |
| Tetramer7  | S0.000346001.957402000.94148800<br>S-0.00022500-1.988119000.72925000<br>S3.108933000.05075400-0.92962000<br>S-3.108751000.05108700-0.92963600<br>H-0.982837001.624884000.07438600<br>H0.981331001.625549000.07167900<br>H-0.00033300-2.488273001.98007200<br>H0.00010900-0.701952001.15682600<br>H3.807884000.354966000.18195600<br>H2.44687100-0.95418400-0.31513200<br>H-3.811255000.353887000.18009200<br>H-2.44661700-0.95286700-0.31358400     | 12.991958.662964.1336<br>66.309780.475591.6668<br>94.0033103.7843114.1874<br>145.2877153.1024163.7124<br>219.4701236.5410258.5476<br>268.3621332.9421423.9606<br>1198.34761202.67381203.6811<br>1208.41482645.67232676.7699<br>2689.75132703.20822705.2730<br>2746.31802747.15912747.3934  |
| Tetramer8  | H-1.74687300-1.303092000.04661600<br>H-2.95134300-0.49850000-1.27202800<br>S-2.82653900-0.484904000.06978200<br>H-1.298423001.716939000.01268900<br>H-0.549881003.035022001.25133200<br>S-0.486307002.79816700-0.07371600<br>H1.746567001.30310700-0.05397800<br>H2.967977000.501166001.25062100<br>S2.825523000.48442000-0.08939700<br>H1.29786900-1.71643700-0.00691600<br>H0.55273700-3.05273900-1.22802300<br>S0.48615900-2.796775000.09331100  | -4.066122.188675.0155<br>81.724582.892083.2099<br>103.1594108.7919110.0209<br>116.6334197.6984200.0522<br>204.3407213.2779231.6347<br>325.8345336.4471433.9344<br>1202.05981203.58821204.9680<br>1207.66512631.38152640.0004<br>2649.38402651.60132743.8297<br>2744.48422746.09692747.3402 |
| Tetramer9  | S-3.28490900-0.00194700-0.72043500<br>H-3.83396700-0.525864000.39324800<br>H-2.594420000.92580100-0.02174400<br>S-0.00043400-1.990688000.69150800<br>H0.98367100-1.62145900-0.15844700<br>H-0.98486200-1.62132400-0.15801000<br>S3.28447300-0.00244800-0.72055200<br>H2.596273000.92477500-0.01893000<br>H3.83646300-0.527961000.39092500<br>S0.000619001.994199000.70245300<br>H0.000253000.662720000.95696500<br>H0.000597001.79746400-0.63157200 | 20.663251.894361.0840<br>64.048979.544484.4789<br>91.6613119.8521128.3499<br>143.9650175.5134196.9317<br>216.1451236.3239253.1551<br>273.9113313.6740423.6914<br>1201.94281202.83631204.1345<br>1207.10232641.13432689.4651<br>2690.34822693.11592705.2177<br>2739.20862743.26212743.5720  |
| Tetramer10 | S0.00179000-1.99485100-0.70350100<br>H0.00013900-0.66297100-0.95602800<br>H-0.00103000-1.800003000.63080600<br>S3.282354000.004003000.72228700<br>H2.59093800-0.922968000.02340500<br>H3.836725000.52369000-0.39074000<br>S-3.283339000.002264000.72185500<br>H-2.59382800-0.923635000.01977100<br>H-3.834425000.52871600-0.38961200<br>S-0.000964001.98920400-0.69392500<br>H0.986229001.624595000.15448400<br>H-0.982210001.622662000.16045400    | 20.682252.005661.5483<br>64.301679.855684.2191<br>92.0155120.7335128.2779<br>144.3414176.1867196.8299<br>216.4897236.2826253.4397<br>274.2287314.0206424.3544<br>1201.92941202.83281204.1666<br>1207.07012640.86482689.0863<br>2690.26632693.04642704.7883<br>2738.90462743.54712743.9681  |
| Tetramer11 | S-1.253508002.31274300-0.12964600                                                                                                                                                                                                                                                                                                                                                                                                                   | 7.839012.548349.4444                                                                                                                                                                                                                                                                       |



|           |                                                                                                                                                                                                                                                                                                                                                                                                                                                                                                                                                                |                                                                                                                                                                                                                                                                                                                                                                                |
|-----------|----------------------------------------------------------------------------------------------------------------------------------------------------------------------------------------------------------------------------------------------------------------------------------------------------------------------------------------------------------------------------------------------------------------------------------------------------------------------------------------------------------------------------------------------------------------|--------------------------------------------------------------------------------------------------------------------------------------------------------------------------------------------------------------------------------------------------------------------------------------------------------------------------------------------------------------------------------|
|           | H-2.263418001.424759000.02560800<br>H-1.132724002.508105001.19836600<br>S-3.55860100-1.003683000.19763900<br>H-3.85146000-1.07307200-1.11603100<br>H-2.29512800-1.447350000.00681900<br>S4.350023000.082456000.12381700<br>H5.02114800-1.04057000-0.19830300<br>H3.15906000-0.44940600-0.23020100<br>S0.49650000-1.30266800-0.22865300<br>H0.66539000-1.350345001.10798000<br>H0.146509000.00630900-0.20475200                                                                                                                                                 | 70.926376.788389.9111<br>102.3829110.3884116.1831<br>123.8201133.8281174.1878<br>195.8269218.5099263.4398<br>292.8324303.8542434.9071<br>1202.55141203.71621204.7735<br>1206.13662645.67492666.4444<br>2677.60302697.82532738.8054<br>2743.40432744.63242748.0297                                                                                                              |
| Pentamer1 | S-3.331588000.068578000.20015200<br>H-2.44299200-0.508585001.03699700<br>H-2.729082001.271964000.31253100<br>S-0.19777000-0.71816800-2.15850800<br>H-0.72414000-0.51240000-3.38131200<br>H-1.37250900-0.48682300-1.52411900<br>S3.355747000.13505200-0.04169100<br>H2.639852001.224436000.31415700<br>H2.59205500-0.07080200-1.13451800<br>S0.002769002.283058000.55345200<br>H-0.070700001.041177001.08303700<br>H0.033486001.79059800-0.70417700<br>S0.21298100-1.775681001.59642000<br>H0.00016200-2.375016000.40693000<br>H1.39963900-1.259976001.19328700 | 30.901740.862245.6309<br>61.060565.055977.0632<br>79.071189.984893.9262<br>108.8898124.9986141.1555<br>142.7720167.8026174.8009<br>207.8773221.5584246.1328<br>257.1933269.4638295.4211<br>305.3517393.1931400.9080<br>1195.10941199.37811201.3439<br>1203.72191206.99922646.2016<br>2647.98562694.34482701.2468<br>2704.35402706.68642718.1165<br>2731.26142733.93162748.0498 |
| Pentamer2 | S3.33582200-0.000644000.11889000<br>S0.06668100-0.39782100-2.17483000<br>S-0.14221700-1.968533001.36705800<br>S0.043173002.238066000.82802300<br>S-3.268244000.09380100-0.09325200<br>H2.794098001.211093000.36547800<br>H2.37919700-0.629187000.83663500<br>H0.45316600-0.01088900-3.40627800<br>H1.32057200-0.31228100-1.67056300<br>H0.10369000-2.502024000.15312300<br>H-1.28893900-1.384173000.94257300<br>H0.149517000.967535001.27549100<br>H0.029877001.82656400-0.45973900<br>H-4.039272000.263525000.99923000<br>H-2.465333001.131931000.22981700    | 25.348629.552044.7442<br>60.888368.294971.7820<br>75.286387.404992.1602<br>100.2468120.0854151.4996<br>160.8217175.1813190.3494<br>205.3815212.6175224.9875<br>245.1543284.2563301.7677<br>313.1371386.7647404.2776<br>1196.79031198.86171203.4304<br>1207.15731216.35242644.6425<br>2660.66132692.00402697.3302<br>2700.54722704.90002716.7436<br>2729.37572739.35712744.5599 |
| Pentamer3 | S0.303994002.350227001.09842500<br>H1.387592001.566349000.87810800<br>H0.750264003.322802000.27941300<br>S-0.000359000.00017700-2.31916800<br>H0.04081400-0.96477800-1.37308400<br>H-0.041210000.97426700-1.38254400<br>S-0.30441500-2.350659001.09813200<br>H-1.38806200-1.566279000.87969100<br>H-0.74804500-3.318818000.27245400<br>S-3.184302000.262487000.11922000                                                                                                                                                                                        | 17.075943.899753.5279<br>58.095072.791477.0910<br>81.545892.358895.3372<br>101.7466134.6219140.1989<br>147.5646163.0279166.0669<br>172.8025228.9562240.7388<br>274.6996290.0640302.3439<br>315.9318396.5959404.7313<br>1199.32661199.97921201.3258<br>1208.54671209.78182632.3917                                                                                              |

|           |                                                                                                                                                                                                                                                                                                                                                                                                                                                                                                                                                                   |                                                                                                                                                                                                                                                                                                                                                                                 |
|-----------|-------------------------------------------------------------------------------------------------------------------------------------------------------------------------------------------------------------------------------------------------------------------------------------------------------------------------------------------------------------------------------------------------------------------------------------------------------------------------------------------------------------------------------------------------------------------|---------------------------------------------------------------------------------------------------------------------------------------------------------------------------------------------------------------------------------------------------------------------------------------------------------------------------------------------------------------------------------|
|           | H-2.700997000.07355000-1.12730900<br>H-2.193199001.128121000.42515000<br>S3.18487700-0.262870000.11901500<br>H2.70293100-0.07781000-1.12861300<br>H2.19319500-1.127214000.42676400                                                                                                                                                                                                                                                                                                                                                                                | 2633.92812692.01612699.5721<br>2701.16222704.47112713.8799<br>2714.98292745.77232746.2026                                                                                                                                                                                                                                                                                       |
| Pentamer4 | S3.34378900-0.05888200-0.00724300<br>H2.67016900-1.12420600-0.49324600<br>H2.535303000.021772001.07001700<br>S0.111907001.87873400-1.48931900<br>H0.132981002.69303700-0.41525800<br>H1.258147001.25855200-1.12170800<br>S-3.30366400-0.08719300-0.22116100<br>H-2.348755000.56798700-0.91803000<br>H-2.69494800-1.27669900-0.41444500<br>S-0.202849000.662567002.16930900<br>H-1.389489000.469108001.54435100<br>H-0.622417000.087434003.31338700<br>S0.06206000-2.26365700-0.64575000<br>H0.06196700-1.437245000.42574300<br>H0.21714900-3.364841000.11581000   | 16.323340.642743.1865<br>58.217066.580573.9593<br>78.559992.083894.0526<br>116.4133126.3852141.1791<br>149.9245158.3350166.9400<br>196.8175211.4954222.1059<br>254.2476275.1154294.8143<br>312.6916343.5178409.5509<br>1197.70181201.82021203.0654<br>1204.57231207.01732640.4368<br>2647.73702661.49282688.8826<br>2709.36352719.78322734.7485<br>2738.01452741.99742747.5093  |
| Pentamer5 | S3.28355900-0.09251600-0.09141600<br>H4.090405000.616148000.72300000<br>H2.545947000.99140300-0.41878600<br>S-0.03644000-0.612748002.13113500<br>H0.41507700-0.391392003.38121000<br>H1.20099900-0.529124001.58760300<br>S-0.03945700-1.64091200-1.64912600<br>H0.44788300-2.21083900-0.52862700<br>H-1.24873900-1.40885600-1.08615200<br>S0.027120002.29032700-0.61852300<br>H0.065462001.04288500-1.14375800<br>H-0.015681001.804346000.64188900<br>S-3.29453500-0.020191000.09886700<br>H-4.056791000.25891700-0.97704000<br>H-2.488524001.04315300-0.11432900 | 13.678930.314844.0496<br>55.919268.313075.7434<br>79.379890.5657100.2729<br>118.5954120.6513131.4140<br>146.8364157.7138174.1027<br>203.4420213.6728226.8180<br>250.4171261.4236292.4812<br>323.8817386.1129424.2568<br>1196.19381200.02921201.9561<br>1204.35931205.60312657.1927<br>2662.35452664.95942694.0117<br>2698.88092703.57882736.9163<br>2741.69592742.81272744.6085 |
| Pentamer6 | S-0.225301001.175573002.05446200<br>H-0.091030002.202690001.19100200<br>H-1.416378000.803461001.52580100<br>S3.34779000-0.077358000.07635900<br>H2.474254000.211172001.06447100<br>H2.71694900-1.23716600-0.20852600<br>S-3.32887900-0.14729100-0.13695800<br>H-2.75454900-1.36574000-0.05064000<br>H-2.406554000.27347500-1.02932500<br>S0.05933400-2.32598800-0.17955600<br>H0.19472300-2.976264000.99361200<br>H0.04799900-1.113758000.41930700<br>S0.113506001.43345400-1.78370400<br>H1.282974000.93134400-1.32167700<br>H0.488419001.33655100-3.07367600    | 24.989541.999044.5173<br>60.015863.633073.2605<br>75.894890.782891.3691<br>98.4011115.5252122.2054<br>142.9419151.7417159.0971<br>180.8891207.9664218.9812<br>240.6285262.8244276.3861<br>301.1079356.2200397.5792<br>1194.40931197.55641200.3082<br>1202.24571206.80862648.2961<br>2650.19332683.45252705.9289<br>2711.56882722.47322727.7918<br>2737.04222740.20032751.8960   |

|            |                                                                                                                                                                                                                                                                                                                                                                                                                                                                                                                                                                       |                                                                                                                                                                                                                                                                                                                                                                                 |
|------------|-----------------------------------------------------------------------------------------------------------------------------------------------------------------------------------------------------------------------------------------------------------------------------------------------------------------------------------------------------------------------------------------------------------------------------------------------------------------------------------------------------------------------------------------------------------------------|---------------------------------------------------------------------------------------------------------------------------------------------------------------------------------------------------------------------------------------------------------------------------------------------------------------------------------------------------------------------------------|
| Pentamer7  | S-0.138221002.36409100-0.48164900<br>H-1.362073002.105484000.02865200<br>H-0.165222001.24433500-1.23827100<br>S0.06541500-0.902121002.03244800<br>H-0.92339900-0.557051002.88033700<br>H0.030512000.286611001.38897700<br>S0.13760000-1.56166100-1.89762600<br>H1.27373000-1.06399800-1.35370500<br>H-0.22674700-2.13899800-0.73360500<br>S3.273145000.152294000.09411100<br>H2.99881900-0.488897001.24855300<br>H2.424721001.161456000.38493700<br>S-3.20629200-0.080504000.18204000<br>H-3.954574000.37108000-0.84418800<br>H-2.20212900-0.47359700-0.63086900      | 34.079937.441948.5986<br>58.961565.469469.7289<br>70.901188.674994.3648<br>100.6988115.9409135.2994<br>149.3628160.4383172.4179<br>179.0470199.1629218.4324<br>244.6391252.6181261.6721<br>303.3291334.1801381.0474<br>1194.55281195.92801201.3954<br>1203.29321207.20862659.0136<br>2686.38222694.10032703.0994<br>2710.20342713.06062725.8521<br>2739.92752740.97232746.4880  |
| Pentamer8  | S3.26712900-0.025417000.00897500<br>H3.96847100-0.01274400-1.14196500<br>H2.51239900-1.07565800-0.38347000<br>S-0.159494000.349701002.17827300<br>H-0.54349400-0.304196003.29237000<br>H-1.399355000.306785001.63537800<br>S0.079211002.15512300-1.18891100<br>H1.169904001.43780400-0.82823800<br>H0.030891002.79350100-0.00246500<br>S0.04673300-2.30321500-0.81119700<br>H0.16526900-3.46390300-0.13686200<br>H0.00543900-1.566564000.32491500<br>S-3.29189300-0.02726700-0.27210700<br>H-2.294306000.69629700-0.82909200<br>H-2.68219700-1.19412000-0.57110300    | 18.066925.645645.0632<br>58.260467.368370.4007<br>79.337985.130896.3598<br>102.2247126.4635130.7876<br>146.9404167.3178181.6895<br>193.6988221.4176222.8911<br>238.8608276.0297304.9702<br>311.5841374.1424411.0759<br>1198.07501200.21331203.5611<br>1205.54731213.50112648.0573<br>2654.78472658.19842689.2388<br>2697.63642712.23942739.0345<br>2739.25742740.36862750.9539  |
| Pentamer9  | S-0.00102500-0.725600002.27353000<br>H-0.00055400-1.513997001.17185800<br>H-0.001415000.399818001.52285700<br>S-0.000341002.15503600-0.65159900<br>H0.978644002.95417800-0.18258200<br>H-0.977991002.95513800-0.18144000<br>S-3.085209000.30172200-0.11396400<br>H-2.49896200-0.242583000.97461100<br>H-4.11980800-0.56028500-0.08712600<br>S3.085786000.30277200-0.11252600<br>H2.49606100-0.239897000.97500400<br>H4.11481100-0.56594600-0.08720400<br>S0.00134000-2.08784200-1.47539300<br>H0.98251600-1.16074700-1.41245600<br>H-0.98212200-1.16307300-1.41429000 | 23.951245.741455.6387<br>58.393667.604168.2498<br>71.871886.0502102.4782<br>109.4142126.0501145.9006<br>163.4403164.0929171.9306<br>194.2759214.6980232.1965<br>240.3550255.3026273.0395<br>326.1119383.9479425.0870<br>1198.62941201.82611203.4497<br>1205.15621211.56912647.0322<br>2677.29052694.59052695.0785<br>2698.18202709.01482729.0510<br>2746.15092746.58092748.0358 |
| Pentamer10 | S0.094209002.21371500-0.88611000<br>H1.261173001.61398800-1.20888500<br>H0.134316001.717737000.37154500<br>S3.30615600-0.04105600-0.08117100<br>H2.535833000.255664000.98688900<br>H2.77737100-1.27608400-0.19489600                                                                                                                                                                                                                                                                                                                                                  | 24.036935.453950.2945<br>51.196561.623363.4336<br>70.246088.987092.1296<br>95.4578113.4025126.6733<br>141.3514147.9749165.4081<br>172.4168217.1158220.9413                                                                                                                                                                                                                      |

|            |                                                                                                                                                                                                                                                                                                                                                                                                                                                                                                                                                                  |                                                                                                                                                                                                                                                                                                                                                                                |
|------------|------------------------------------------------------------------------------------------------------------------------------------------------------------------------------------------------------------------------------------------------------------------------------------------------------------------------------------------------------------------------------------------------------------------------------------------------------------------------------------------------------------------------------------------------------------------|--------------------------------------------------------------------------------------------------------------------------------------------------------------------------------------------------------------------------------------------------------------------------------------------------------------------------------------------------------------------------------|
|            | S-0.03910200-0.261913002.40737600<br>H-0.06325200-1.080313001.32988200<br>H-1.306437000.150143002.19100100<br>S-3.18895100-0.02758100-0.08270200<br>H-4.205584000.81585100-0.34812200<br>H-2.281254000.74875400-0.71515400<br>S-0.00851500-1.89969500-1.32483100<br>H-0.13609700-0.56857900-1.51688000<br>H-1.33681200-2.11268600-1.41636700                                                                                                                                                                                                                     | 222.4050235.7441250.4651<br>302.5690342.5962380.0647<br>1194.13591196.13841201.8268<br>1203.67681206.70302658.8907<br>2679.37472693.39582698.0742<br>2703.39522715.52052718.3718<br>2734.64092743.26412746.3196                                                                                                                                                                |
| Pentamer11 | S-0.38282800-1.78075000-1.08392800<br>H-0.32740900-0.974163000.00292600<br>H-0.15549000-0.75656200-1.93142000<br>S-0.435825001.011462001.84352200<br>H0.024225001.604277000.71848200<br>H-1.690204000.884427001.35091200<br>S1.637465001.72737800-1.56223800<br>H2.412492000.95159000-0.76815000<br>H2.295625002.85779500-1.24037600<br>S-3.883650000.07592800-0.10678700<br>H-4.27056500-0.847001000.79592100<br>H-2.99309200-0.76471100-0.67958700<br>S3.08757600-1.064724000.91586600<br>H1.99382600-0.698416001.61752700<br>H2.34679100-1.765923000.03080500 | 16.169131.411843.7515<br>49.609665.121474.4298<br>80.243883.208591.9974<br>99.0158113.8774129.0040<br>135.0573156.6239163.7037<br>200.7909210.3365218.2918<br>253.2139284.6096287.6952<br>304.1326377.7814423.2097<br>1198.89321202.71671203.6995<br>1204.86481207.33912649.7873<br>2653.05322667.75732682.8207<br>2689.98062707.04342719.5277<br>2730.01172741.25952748.1537  |
| Pentamer12 | S0.164324000.215620002.25708700<br>H-0.676902000.801404003.13123100<br>H0.110032001.248296001.37913500<br>S3.06269300-0.17474000-0.52919700<br>H2.91149900-0.110373000.80946100<br>H2.14459000-1.16028100-0.65235500<br>S-0.19920700-2.58828000-0.63851000<br>H0.16037900-3.712008000.01268800<br>H-0.34725400-1.887501000.50733300<br>S0.095322002.60906600-0.86338700<br>H1.107863001.72928400-1.04142800<br>H-0.850424001.70723700-1.20802500<br>S-3.089407000.09937600-0.39840000<br>H-2.84484600-1.15341200-0.83425300<br>H-2.25455300-0.039315000.65474200 | 19.477936.391848.8932<br>54.753461.139372.9990<br>77.202683.859493.6969<br>109.3623122.1063139.2622<br>156.1721161.4479178.3602<br>190.3106202.6191218.5689<br>232.2136274.7182303.6249<br>332.6260357.0003421.9644<br>1195.82491199.61351206.3919<br>1207.68201209.01032620.5917<br>2670.16932674.63502690.8494<br>2694.16962710.60192731.5017<br>2732.41362740.84062742.7955 |
| Pentamer13 | S-3.74975800-0.033235000.02209100<br>H-2.79149900-0.98854000-0.00414400<br>H-3.99853000-0.16072400-1.29645500<br>S-0.346591002.04601900-0.64370600<br>H-1.521531001.41439300-0.41042000<br>H-0.868352002.81366000-1.61979400<br>S-0.33292500-2.10752600-0.28398300<br>H-0.36431500-3.160265000.55669300<br>H0.13158800-1.269651000.67519400<br>S3.05579200-0.17539500-1.34902100<br>H1.917272000.52886000-1.53011900<br>H2.37770800-1.33626200-1.22982200                                                                                                        | 6.826121.971849.9252<br>59.059061.497871.9090<br>79.948887.157295.5762<br>96.4846116.8736119.9529<br>131.7577150.9706172.6718<br>188.9885200.1623233.1358<br>242.7740273.3849282.2630<br>317.0004359.8124421.1613<br>1197.61941200.43191201.6623<br>1205.28341209.57782637.5363<br>2655.02292656.38902680.4188<br>2703.56812717.62712734.3464                                  |

|            |                                                                                                                                                                                                                                                                                                                                                                                                                                                                                                                                                                      |                                                                                                                                                                                                                                                                                                                                                                               |
|------------|----------------------------------------------------------------------------------------------------------------------------------------------------------------------------------------------------------------------------------------------------------------------------------------------------------------------------------------------------------------------------------------------------------------------------------------------------------------------------------------------------------------------------------------------------------------------|-------------------------------------------------------------------------------------------------------------------------------------------------------------------------------------------------------------------------------------------------------------------------------------------------------------------------------------------------------------------------------|
|            | S1.490907000.295187002.35348900<br>H0.933476001.472639002.00479800<br>H2.305383000.285069001.27214300                                                                                                                                                                                                                                                                                                                                                                                                                                                                | 2740.40982741.72212748.4243                                                                                                                                                                                                                                                                                                                                                   |
| Pentamer14 | S0.91291200-2.76277300-0.49876000<br>H0.50089100-2.070179000.58700200<br>H-0.19240500-2.43983200-1.20184800<br>S-0.175193000.116882002.24455800<br>H-1.40223100-0.175420001.76047100<br>H-0.38244100-0.566775003.38730900<br>S2.772106000.80776300-0.40643900<br>H2.21708200-0.40381900-0.64416200<br>H3.243193000.91757000-1.66428400<br>S-2.61419900-0.85650600-0.68200200<br>H-3.83127000-0.41606300-1.05489700<br>H-2.036415000.35662400-0.85896100<br>S-0.757032002.69027700-0.67680100<br>H0.465580002.10567400-0.66867300<br>H-0.799479002.761939000.66916400 | 16.223421.281649.7401<br>52.094960.558076.2932<br>81.204886.039289.8357<br>99.3305119.7268124.1976<br>134.0496155.7224156.8478<br>176.9249204.4266216.7169<br>237.8932297.9807300.2680<br>306.7666361.7807404.0199<br>1195.57581200.34211204.5652<br>1207.76841210.61582633.9654<br>2643.45252658.57652683.4527<br>2701.92222727.22942739.7914<br>2743.97412747.75982750.3431 |
| Pentamer15 | S-3.54890800-0.03045200-0.11905200<br>H-2.67996800-1.06453200-0.05655800<br>H-3.69636300-0.15282100-1.45308800<br>S1.291129000.164488002.36431600<br>H0.751613001.134486001.58606500<br>H2.488971000.245553001.75044900<br>S-0.26928100-2.35790400-0.29512400<br>H0.21230200-1.572368000.70081500<br>H-0.16412800-3.481024000.44141500<br>S2.78650000-0.05071700-1.33769200<br>H3.16556100-0.26506400-2.61241900<br>H2.08457200-1.20243000-1.27037700<br>S-0.334568002.46989400-0.45692100<br>H0.434888001.60339400-1.15143800<br>H-1.395390001.62986400-0.42330000  | 10.647820.158339.4940<br>57.532869.490570.5183<br>79.199782.768889.4006<br>94.815299.9610100.9875<br>122.9060145.6094156.7530<br>163.2980190.6624225.9027<br>255.2991275.1796311.8404<br>359.7278375.0254418.6605<br>1193.75871198.03631203.3609<br>1204.36291208.31542606.9145<br>2640.80982662.17512684.3892<br>2701.89452711.64532732.3499<br>2744.68042745.21792751.2436  |
| Pentamer16 | S0.415194001.31569800-1.62982600<br>H1.599349001.15241000-0.99545900<br>H-0.203118001.81170700-0.53295700<br>S-2.138439001.689208001.48680900<br>H-2.868793001.018249000.57053700<br>H-1.500596000.563248001.87443700<br>S0.41687500-1.531513001.32795800<br>H-0.25702100-2.547997000.75317300<br>H0.40371500-0.794875000.19379400<br>S-2.59226000-1.38594100-1.11783700<br>H-1.51621500-0.65794800-1.49343400<br>H-3.11178500-1.39186900-2.36109500<br>S3.908398000.061720000.08767700<br>H3.16908200-0.952022000.58720500<br>H4.12909400-0.58764800-1.07272100     | 14.612639.554945.8110<br>56.343558.214970.6940<br>73.917775.558687.5410<br>92.6831115.9643117.8669<br>130.4898163.5530190.0406<br>201.6031211.9010223.6227<br>231.2453261.3310269.1764<br>333.2446337.2786408.6142<br>1198.04261200.50121201.4712<br>1203.06551217.01852658.9100<br>2678.32492679.35512690.5959<br>2698.95452702.84792714.6689<br>2743.18622745.34032750.2348 |
| Pentamer17 | S1.828692002.06001300-1.10531700<br>H2.508522001.01080800-0.58402000                                                                                                                                                                                                                                                                                                                                                                                                                                                                                                 | 12.710032.370139.6361<br>47.121163.984473.6668                                                                                                                                                                                                                                                                                                                                |

|            |                                                                                                                                                                                                                                                                                                                                                                                                                                                                                                                                                               |                                                                                                                                                                                                                                                                                                                                                                                |
|------------|---------------------------------------------------------------------------------------------------------------------------------------------------------------------------------------------------------------------------------------------------------------------------------------------------------------------------------------------------------------------------------------------------------------------------------------------------------------------------------------------------------------------------------------------------------------|--------------------------------------------------------------------------------------------------------------------------------------------------------------------------------------------------------------------------------------------------------------------------------------------------------------------------------------------------------------------------------|
|            | H2.267134002.90909600-0.15505300<br>S-0.366467000.470017001.98128100<br>H0.138346001.240998000.99072100<br>H-0.43120300-0.603633001.16365700<br>S2.98705000-1.364798000.64784500<br>H2.28506500-0.787314001.64639300<br>H1.85943700-1.754571000.01425900<br>S-0.52739900-1.40102600-1.61642800<br>H-1.77165300-1.08378400-1.18692500<br>H-0.17737300-0.10329400-1.73417000<br>S-3.887211000.19770400-0.01932500<br>H-4.29892200-0.806954000.77921700<br>H-2.934016000.588095000.85703100                                                                      | 76.477986.625891.2218<br>97.4393108.6487120.2815<br>122.6600143.0390161.9129<br>200.2670205.3587223.0934<br>252.4535266.2270282.7810<br>311.2757379.8341407.1425<br>1197.09501200.67971202.5009<br>1203.11041204.83592658.9294<br>2664.89352670.89512679.8169<br>2699.09532706.53942720.2142<br>2727.87942746.21352746.7215                                                    |
| Pentamer18 | S-0.31549900-2.474669000.47307500<br>H0.47922900-1.586281001.11072100<br>H-1.37273300-1.630258000.43782900<br>S-0.291495002.390275000.23384000<br>H-0.308644003.49022700-0.54387700<br>H0.170667001.59919800-0.76496600<br>S-3.537302000.010562000.11868900<br>H-3.710861000.114798001.45109300<br>H-2.657836001.037610000.08756000<br>S1.42677800-0.21267700-2.24879500<br>H0.77802500-1.15485900-1.52086000<br>H0.65289800-0.40335900-3.33473600<br>S2.752224000.115895001.52197000<br>H3.28544000-0.008796000.28987200<br>H2.128504001.271533001.20689100  | 13.665422.700436.2451<br>58.652871.009676.1643<br>85.230686.240692.5643<br>100.9088118.9241132.4962<br>141.2639146.4103158.0627<br>176.5822193.6725214.8831<br>283.5612287.8095321.5180<br>346.4765389.9400420.5817<br>1195.55951201.13451203.3843<br>1206.22451207.62292622.1370<br>2634.78192662.74492680.2761<br>2695.91872706.98492740.9884<br>2743.67562743.97242747.7628 |
| Pentamer19 | S-0.422836002.10186900-1.24078900<br>H-1.689452001.72816800-0.95214900<br>H-0.057637000.82080500-1.46589900<br>S-3.31587200-0.388987000.04403000<br>H-4.243743000.182868000.83676400<br>H-2.38660100-0.405800001.02376700<br>S0.160160000.165232002.16351200<br>H0.209265001.120158003.11314900<br>H-0.014305001.062129001.16251500<br>S0.11303800-1.98157100-0.91997200<br>H1.36482100-1.46683100-0.93248200<br>H0.02721200-2.00081700-2.26482500<br>S3.470362000.08797200-0.15798000<br>H2.635189000.205631000.89925000<br>H4.07761100-0.998563000.35910700 | 13.138319.482842.8197<br>58.588768.230774.3275<br>77.162587.997698.4847<br>110.1601116.6271120.0803<br>129.3790146.9419158.3547<br>162.4259183.8953190.5985<br>242.6874255.6244300.4750<br>306.0089365.5300419.9361<br>1195.88221198.30401199.9817<br>1202.77441206.87242641.1082<br>2661.79212690.91452696.8160<br>2715.44992716.72902745.2712<br>2745.37372746.27362747.8727 |
| Pentamer20 | S-0.00552500-2.2222400-0.76732700<br>H1.26316800-1.76432300-0.64648200<br>H0.24590200-3.31832900-0.02458700<br>S-0.007377000.500334002.21197800<br>H0.03819300-0.492314001.29282600<br>H-0.00781600-0.359410003.24956800<br>S-0.019222002.00368600-1.33896100<br>H-0.206676002.71448700-0.20914200                                                                                                                                                                                                                                                            | 18.860635.954738.3680<br>50.259063.644276.6381<br>79.348990.732694.0288<br>116.8626127.1536142.5951<br>154.3575160.3632176.9965<br>198.6274206.0400213.8371<br>232.0001262.4240304.9741<br>311.9132382.8892401.2004                                                                                                                                                            |

|            |                                                                                                                                                                                                                                                                                                                                                                                                                                                                                                                                                                   |                                                                                                                                                                                                                                                                                                                                                                                |
|------------|-------------------------------------------------------------------------------------------------------------------------------------------------------------------------------------------------------------------------------------------------------------------------------------------------------------------------------------------------------------------------------------------------------------------------------------------------------------------------------------------------------------------------------------------------------------------|--------------------------------------------------------------------------------------------------------------------------------------------------------------------------------------------------------------------------------------------------------------------------------------------------------------------------------------------------------------------------------|
|            | H-1.114922001.23940600-1.11718000<br>S3.26113700-0.05512300-0.03793800<br>H2.210205000.73516400-0.35623600<br>H3.74522000-0.02804800-1.29590400<br>S-3.20658400-0.19533900-0.19026300<br>H-2.48462200-0.037424000.94063900<br>H-4.047517000.809435000.12667800                                                                                                                                                                                                                                                                                                    | 1198.46231200.95321202.7730<br>1207.47541209.16192652.7275<br>2656.10802668.54962679.0255<br>2698.51522739.32202739.8795<br>2742.42502742.81732743.2283                                                                                                                                                                                                                        |
| Pentamer21 | S0.264789002.400125000.32635100<br>H-0.111169001.63434500-0.72616200<br>H0.338277003.52048400-0.41833600<br>S-1.25296900-0.21250500-2.27588000<br>H-0.64572700-1.14558700-1.50160000<br>H-0.46185400-0.45879000-3.33778600<br>S-2.857271000.097390001.35654100<br>H-2.216214001.260491001.11138800<br>H-3.29568000-0.005538000.08563000<br>S3.518984000.028955000.27066500<br>H2.636998001.054192000.28594400<br>H3.40264600-0.13221100-1.06237100<br>S0.29910000-2.470452000.55838100<br>H1.35139800-1.625047000.65558700<br>H-0.56080500-1.598546001.13078300   | 11.405820.447540.6041<br>57.463768.275973.1160<br>83.880584.997487.2688<br>94.7552116.6518126.7031<br>129.1816145.9971155.2262<br>174.9474194.2169211.9523<br>274.7688284.4963322.4254<br>339.1209376.2701402.9978<br>1194.18091200.30791202.2431<br>1204.93891206.18712627.2912<br>2653.93522672.09162680.2433<br>2688.86482714.56122740.5263<br>2743.09242743.95692744.2839  |
| Pentamer22 | S0.20238800-0.71927300-2.15427700<br>H0.61210800-0.15053800-3.30514100<br>H1.38917700-0.50760900-1.53562800<br>S-0.11408500-1.821358001.53965500<br>H-0.13452500-2.690617000.50952700<br>H-1.26527500-1.227277001.14517700<br>S-0.061904002.265508000.60671800<br>H-0.065483001.39417000-0.42867700<br>H-0.224506003.33241500-0.20073600<br>S-3.347072000.05874100-0.00589000<br>H-2.682453001.132916000.47281900<br>H-2.52440600-0.03605000-1.07125600<br>S3.310711000.092915000.20851600<br>H2.36265200-0.553291000.92272500<br>H2.692111001.281334000.37563700 | 12.199419.091541.0182<br>57.717462.593178.7776<br>81.226284.027993.0028<br>103.7667109.3719115.6844<br>122.3711145.5438158.4330<br>170.3403197.7591207.3313<br>247.9209281.7329298.3228<br>321.1992370.2154414.5076<br>1194.53741199.80421203.2547<br>1206.24321207.51072618.4983<br>2639.69912672.88102674.5371<br>2713.31972717.96662743.7784<br>2744.40982746.22442754.0371 |
| Pentamer23 | S-3.07397800-0.06315400-0.17217200<br>H-4.379775000.24267600-0.03953900<br>H-3.19858300-1.224563000.49886600<br>S0.067296001.79927000-1.58419500<br>H1.032788002.73990900-1.59429100<br>H0.030420001.74857300-0.23168500<br>S-0.018206000.749296002.27854100<br>H-0.03450200-0.410895001.58495700<br>H-1.324407000.972224002.02202300<br>S3.20713000-0.196576000.07546000<br>H2.260883000.41633100-0.67211900<br>H3.79454000-0.75177200-1.00316700<br>S-0.12864700-2.31584700-0.53487800<br>H-0.17303300-1.28975600-1.40981200                                    | 16.791831.199544.9456<br>49.097758.467363.5072<br>74.981979.589193.0756<br>96.3176106.8642120.0276<br>135.4487138.8740159.3566<br>172.2573182.0703204.4950<br>223.8329255.8509308.1318<br>309.5951330.0564389.4819<br>1196.18471199.28351200.1096<br>1201.77251206.53202661.2651<br>2677.13782681.75872703.3353<br>2723.48772728.05442735.5988<br>2740.24132750.21972754.1304  |

H1.13414700-2.01055000-0.15931800

**Table S6:** Geometry and frequencies of (H<sub>2</sub>O)<sub>n</sub> n = 2-5 clusters optimized at ωB97X-D/aug-cc-pVDZ level of theory

| Species | Geometry                                                                                                                                                                                                                                                                                                                               | Frequency                                                                                                                                                                                                 |
|---------|----------------------------------------------------------------------------------------------------------------------------------------------------------------------------------------------------------------------------------------------------------------------------------------------------------------------------------------|-----------------------------------------------------------------------------------------------------------------------------------------------------------------------------------------------------------|
| Monomer | O0.000000000.000000000.11722200<br>H0.000000000.76092200-0.46888900<br>H0.000000000-0.76092200-0.46888900                                                                                                                                                                                                                              | 1630.17733883.81723995.5824                                                                                                                                                                               |
| Dimer   | H-0.547504000.002069000.04949900<br>O-1.50123800-0.00097300-0.12120100<br>H-1.908952000.006091000.74729500<br>O1.381932000.001014000.11461300<br>H1.70261900-0.76737700-0.36570400<br>H1.708291000.75889400-0.37839300                                                                                                                 | 137.0066160.6412163.9911<br>196.4262377.3560649.4118<br>1627.88971651.02263757.4963<br>3872.97853962.47193980.8344                                                                                        |
| Tr1     | O-0.159901001.594146000.11320000<br>H-0.095313002.19944000-0.62891100<br>H0.634059001.030421000.06266100<br>O-1.30833400-0.93346400-0.09739700<br>H-1.209520000.03383800-0.02270000<br>H-1.90694100-1.190407000.60701500<br>O1.46905500-0.65318700-0.08782600<br>H0.59224000-1.07757500-0.06020600<br>H1.97891800-1.055684000.61833000 | 174.6122184.5086193.6477<br>202.0201225.3307248.9552<br>354.2906364.8615459.6474<br>598.1812677.0467901.3304<br>1638.59891642.4953662.4231<br>3604.16683667.42033678.2363<br>3950.52143954.14003955.7648  |
| Tr2     | O0.29501000-1.58136100-0.07192100<br>H-0.54950600-1.09777100-0.02598600<br>H0.24684900-2.262583000.60157000<br>O1.222304001.04591000-0.07164900<br>H1.229914000.07271900-0.02741200<br>H1.836619001.346202000.60090100<br>O-1.517537000.53543700-0.07221500<br>H-2.084016000.913952000.60291500<br>H-0.678076001.02759200-0.02571200   | 140.9210144.9132192.5947<br>193.7559198.5356231.4871<br>366.1267366.4869522.6090<br>563.9170564.6172857.0893<br>1643.16431643.40131673.5572<br>3624.85123684.27843684.9187<br>3959.08123959.62533961.1910 |
| Tr3     | O-2.71321000-0.34880900-0.00001800<br>H-2.77037600-1.306670000.00003600<br>H-1.76697900-0.14951400-0.00000800<br>O2.71320800-0.348809000.00001700<br>H2.77037900-1.30667000-0.00004300<br>H1.76697600-0.149519000.00000800<br>O0.000002000.732287000.00000200<br>H-0.000003001.31750600-0.76389600<br>H0.000002001.317508000.76389900  | 21.520874.267382.5027<br>139.2119161.4080161.4592<br>172.6623202.9079318.8657<br>461.8268593.7136628.6118<br>1633.80321636.51231647.1605<br>3781.39733793.86373864.5622<br>3961.96583964.93053965.7135    |
| Tr4     | O2.62495600-0.45243300-0.00154800<br>H3.01167000-0.00276000-0.75823100<br>H3.02087700-0.029946000.76591600                                                                                                                                                                                                                             | 34.846452.579564.9540<br>123.4917138.4643140.1011<br>141.9575190.4559288.4722                                                                                                                             |



|     |                                                                                                                                                                                                                                                                                                                                                                                                                                                    |                                                                                                                                                                                                                                                                                                 |
|-----|----------------------------------------------------------------------------------------------------------------------------------------------------------------------------------------------------------------------------------------------------------------------------------------------------------------------------------------------------------------------------------------------------------------------------------------------------|-------------------------------------------------------------------------------------------------------------------------------------------------------------------------------------------------------------------------------------------------------------------------------------------------|
|     | O0.000154000.847053000.00000100<br>H0.770537000.263457000.00308500<br>H-0.770790000.26420200-0.00365600<br>O-2.62490600-0.452270000.00152600<br>H-3.02235000-0.03051700-0.76554900<br>H-3.01157400-0.003237000.75860800                                                                                                                                                                                                                            | 511.6201623.3244637.2647<br>1630.07831630.77141653.3077<br>3766.32983850.52693872.5858<br>3875.90513980.09623980.3049                                                                                                                                                                           |
| Te1 | O-0.13156900-1.923167000.01257500<br>H0.68808600-1.38312800-0.01471400<br>H-0.04241200-2.490200000.78147000<br>O1.92316700-0.13157000-0.01257000<br>H2.49021100-0.04241900-0.78145900<br>H1.38312800.688086000.01470500<br>O-1.923168000.13156900-0.01255200<br>H-2.490223000.04241000-0.78143000<br>H-1.38312800-0.688086000.01472600<br>O0.131570001.923167000.01254700<br>H0.042419002.490219000.78142900<br>H-0.688087001.38312900-0.01472400  | 51.099181.9191214.3386<br>218.8856248.4110248.4705<br>261.1544261.1962268.3337<br>299.9716406.1426445.9224<br>459.7831459.8118760.2082<br>836.4244836.46411011.2645<br>1642.28111655.85331655.8863<br>1685.16093422.36373520.2472<br>3520.26313559.38783949.2938<br>3950.07163950.13683951.3631 |
| Te2 | O1.515000001.196906000.09698000<br>H1.524199000.216647000.04120100<br>H2.096123001.49997800-0.60360700<br>O-1.205103001.506162000.09415700<br>H-0.224855001.547616000.07964600<br>H-1.501461002.07310500-0.62086600<br>O1.20516900-1.50628300-0.09269100<br>H1.50081000-2.072259000.62339400<br>H0.22490900-1.54765900-0.07905900<br>O-1.51488800-1.19681400-0.09844300<br>H-2.09702300-1.500586000.60099600<br>H-1.52412700-0.21660900-0.04172500 | 31.649077.2692202.8300<br>214.2995217.2521249.3120<br>258.0015264.0591268.3008<br>279.6936390.2483414.7163<br>498.8739549.7425671.4286<br>767.6958845.8128975.3690<br>1651.66731656.49111674.8733<br>1686.32133429.90873519.1246<br>3531.07043562.19863950.3781<br>3951.29553952.25353953.2411  |
| Te3 | O-0.00000100-1.32058900-0.91072200<br>H-0.76512000-1.33421600-0.31592200<br>H0.76511900-1.33421700-0.31592200<br>O0.000000001.36651200-0.62908800<br>H0.000000001.98630100-1.36113900<br>H0.000000000.46249500-1.01911300<br>O2.04986900-0.097470000.70035300<br>H1.531958000.678057000.43453900<br>H2.259667000.027829001.62791800<br>O-2.04986900-0.097469000.70035400<br>H-1.531958000.678058000.43453900<br>H-2.259662000.027828001.62792000   | 45.149249.7960134.8571<br>148.3002150.9707168.7076<br>189.8638254.2335257.7104<br>325.4560368.6705393.7940<br>420.9259552.8231555.1696<br>609.4329785.7577968.3188<br>1627.07241633.62211654.6912<br>1667.53373450.89083731.6212<br>3742.92593756.94943822.8442<br>3952.64963962.09463964.2790  |
| Te4 | O1.644250001.40758000-0.31791800<br>H2.124656001.961477000.30135300<br>H0.818319001.152883000.14357500<br>O-0.403732000.036830000.88034100<br>H0.12988000-0.736786000.63771200                                                                                                                                                                                                                                                                     | 25.778243.575475.6015<br>147.9514174.7515190.0989<br>194.3088209.2379221.3250<br>260.8472266.5464374.5218<br>408.2527525.8890587.0598                                                                                                                                                           |

|     |                                                                                                                                                                                                                                                                                                                                                                                                                                                                                                                                                               |                                                                                                                                                                                                                                                                                                                                                                                      |
|-----|---------------------------------------------------------------------------------------------------------------------------------------------------------------------------------------------------------------------------------------------------------------------------------------------------------------------------------------------------------------------------------------------------------------------------------------------------------------------------------------------------------------------------------------------------------------|--------------------------------------------------------------------------------------------------------------------------------------------------------------------------------------------------------------------------------------------------------------------------------------------------------------------------------------------------------------------------------------|
|     | H-1.25853800-0.077052000.43793900<br>O1.86260100-1.38083600-0.12374200<br>H1.93123600-1.83955700-0.96367500<br>H2.04703900-0.44425200-0.32201800<br>O-2.97558600-0.13090400-0.37818500<br>H-3.125115000.60015400-0.98388700<br>H-3.68774100-0.078227000.26503100                                                                                                                                                                                                                                                                                              | 654.6894748.4464953.0513<br>1626.09281645.39651651.3386<br>1667.70063541.65953650.9258<br>3711.03273785.13003874.8507<br>3948.73663955.79263983.5355                                                                                                                                                                                                                                 |
| Te5 | O2.250043000.00000000-0.00000100<br>H2.829468000.00000000-0.76628600<br>H2.82947000-0.000001000.76628200<br>O-2.250043000.000000000.00000000<br>H-2.829474000.00000100-0.76628100<br>H-2.82946400-0.000001000.76628800<br>O0.000000001.945997000.00000100<br>H0.762567001.354731000.00000100<br>H-0.762567001.35473100-0.00000100<br>O0.00000000-1.945997000.00000000<br>H0.76256700-1.35473100-0.00000100<br>H-0.76256700-1.35473100-0.00000200                                                                                                              | 41.466563.6846113.7502<br>123.8539126.1474130.6095<br>147.4069154.8533157.5160<br>158.3198168.8234271.1022<br>417.7207428.6107536.6862<br>549.4735556.5337610.0009<br>1626.00701627.34861644.7327<br>1692.99023794.86273804.8757<br>3869.78743873.37503879.6307<br>3901.28713988.70463988.8683                                                                                       |
| P1  | O0.078708002.29570300-0.06042100<br>H0.872543001.726582000.05207100<br>H0.255507002.82458600-0.84123900<br>O-2.167176000.77674400-0.07625800<br>H-1.370134001.35272600-0.08223500<br>H-2.779073001.190916000.53506600<br>O1.29557700-1.89085400-0.15350200<br>H0.31627500-1.90168100-0.06584300<br>H1.48341600-2.34103900-0.97967500<br>O2.211847000.639213000.16400300<br>H2.733352000.634736000.96911100<br>H1.91840400-0.290347000.03426400<br>O-1.40597900-1.829457000.06334800<br>H-1.73966600-0.905639000.03341300<br>H-1.79444100-2.221629000.84771300 | 25.060443.082766.5852<br>69.6623194.9644200.5005<br>205.8610235.6674256.6450<br>258.5014271.4161304.5632<br>319.3159323.8761419.1494<br>434.8939461.8977475.1986<br>531.5038729.7247799.0854<br>876.1888892.9465996.7576<br>1644.67181655.47011666.3149<br>1685.22591694.18593394.1532<br>3480.09513486.04403535.3421<br>3538.62243949.09583950.4404<br>3952.97283954.13313959.1117  |
| P2  | O-0.133211000.196633001.66484000<br>H-0.338227000.299634002.59577200<br>H-0.994350000.137128001.18333700<br>O-2.170179000.08591500-0.05019700<br>H-2.80714300-0.62820500-0.11914400<br>H-1.53736300-0.04190600-0.79914200<br>O1.15031700-1.848712000.18831700<br>H0.81698700-1.230150000.86083000<br>H2.10461500-1.742176000.19794700<br>O1.279212001.72606500-0.22150100<br>H0.834343001.363477000.56452600<br>H1.086715002.66616900-0.21848600<br>O-0.11540900-0.21677200-1.76412800                                                                        | 29.769352.009793.7123<br>169.5415176.3392206.7754<br>218.4996228.7227253.3754<br>268.4300275.5559278.7734<br>293.3746351.3349399.3899<br>431.4412494.8060514.8182<br>650.1841667.1242728.1865<br>789.4058910.1296963.1921<br>1645.17511645.78191667.2039<br>1691.43371704.43263325.5749<br>3422.13483654.32163678.2725<br>3706.77323735.53463946.0079<br>3949.80663952.54503955.8517 |

|    |                                                                                                                                                                                                                                                                                                                                                                                                                                                                                                                                                                  |                                                                                                                                                                                                                                                                                                                                                                                       |
|----|------------------------------------------------------------------------------------------------------------------------------------------------------------------------------------------------------------------------------------------------------------------------------------------------------------------------------------------------------------------------------------------------------------------------------------------------------------------------------------------------------------------------------------------------------------------|---------------------------------------------------------------------------------------------------------------------------------------------------------------------------------------------------------------------------------------------------------------------------------------------------------------------------------------------------------------------------------------|
|    | H0.397196000.56655300-1.50143600<br>H0.35138000-0.93556400-1.30286000                                                                                                                                                                                                                                                                                                                                                                                                                                                                                            |                                                                                                                                                                                                                                                                                                                                                                                       |
| P3 | O1.537483001.54384300-0.35500000<br>H1.531437001.80268100-1.27936100<br>H1.851949000.61157800-0.35024500<br>O-2.27273400-0.27056800-0.98560300<br>H-1.983522000.44811300-0.39697400<br>H-3.23067800-0.28220700-0.93508400<br>O2.05811400-1.11080000-0.30639600<br>H2.73115400-1.540419000.22500000<br>H1.19324500-1.409149000.05630800<br>O-0.850231001.286461000.86093800<br>H0.008997001.482354000.41741000<br>H-1.007697002.006094001.47452900<br>O-0.40948500-1.561810000.73497800<br>H-1.07456800-1.513127000.02945800<br>H-0.52549800-0.702921001.16762600 | 37.901450.531276.5487<br>116.4297167.3310175.7816<br>214.6178228.9195256.0905<br>262.7004280.9655287.6603<br>313.2150356.1392407.4375<br>433.9718463.1110502.8944<br>556.2456657.2088737.4034<br>828.8108884.43351001.8086<br>1644.64831652.55831658.2166<br>1682.49801707.40663378.9957<br>3458.34363512.18603678.5704<br>3745.84073804.66233943.5137<br>3954.04253956.23123957.8862 |
| P4 | O2.43404100-0.222383000.84748200<br>H1.976938000.521397000.41722800<br>H2.36066500-0.062347001.79065300<br>O0.776254001.39284900-0.73244300<br>H0.941274002.13780900-1.31302900<br>H-0.123117001.52539000-0.35451300<br>O0.50999400-1.49739900-0.80675600<br>H1.20969400-1.44706900-0.13486200<br>H0.56173300-0.61526300-1.20234100<br>O-1.92787000-1.251552000.34823100<br>H-2.57893100-1.76313300-0.13613300<br>H-1.05674000-1.46930600-0.05710000<br>O-1.724703001.442377000.28185300<br>H-1.907909001.781710001.16037100<br>H-1.925322000.479667000.32279300 | 41.783546.778475.3128<br>107.9067172.6891191.3185<br>215.5409237.3896257.1920<br>269.5835282.4514294.9004<br>303.7239373.9610382.2767<br>430.6901452.8662492.9810<br>540.9565666.6385770.2076<br>845.0138869.6865985.9594<br>1631.55231648.56471663.1611<br>1682.30931716.21693392.4069<br>3465.92203507.32173672.0570<br>3739.85433813.33453951.1269<br>3953.62453955.52503958.9248  |
| P5 | O1.65566700-0.44138500-1.24792800<br>H1.89832700-0.14287000-0.35456900<br>H2.47211600-0.70670100-1.67608400<br>O1.278496000.462407001.33866100<br>H1.673561000.952285002.06160600<br>H0.666099001.078617000.86715200<br>O-2.39144100-0.06000000-0.24160900<br>H-1.78306400-0.776357000.03974400<br>H-3.15533100-0.110198000.33579400<br>O-0.33304100-1.740534000.42960800<br>H0.14806300-1.192574001.06763500<br>H0.21714700-1.65672200-0.36304400<br>O-0.340560001.76161200-0.34451800<br>H0.091810001.43645100-1.14235200<br>H-1.181697001.26126600-0.30958900 | 37.037762.757972.8095<br>112.8019165.8803192.1392<br>203.9083223.7137230.2049<br>247.3802272.3562285.8669<br>359.3945377.9749397.8451<br>441.1348488.6785508.8109<br>577.6909631.6278698.8181<br>745.7680877.82981003.7947<br>1631.07421651.98381659.4064<br>1685.65401698.88363367.9101<br>3505.01403582.96163686.1864<br>3763.23483820.22943882.5257<br>3957.68993958.45293959.8273 |

|    |                                                                                                                                                                                                                                                                                                                                                                                                                                                                                                                                                                   |                                                                                                                                                                                                                                                                                                                                                                                      |
|----|-------------------------------------------------------------------------------------------------------------------------------------------------------------------------------------------------------------------------------------------------------------------------------------------------------------------------------------------------------------------------------------------------------------------------------------------------------------------------------------------------------------------------------------------------------------------|--------------------------------------------------------------------------------------------------------------------------------------------------------------------------------------------------------------------------------------------------------------------------------------------------------------------------------------------------------------------------------------|
| P6 | O1.784417001.31817300-0.35949800<br>H1.873935000.33880500-0.40540500<br>H2.547493001.618966000.13840300<br>O-0.733079001.543520000.59572000<br>H-0.933933002.432874000.89241300<br>H0.192555001.569457000.25892500<br>O-0.62080200-1.403694001.00937200<br>H-1.26998100-1.281788000.29374600<br>H-0.60680600-0.526126001.41229800<br>O-2.17232400-0.22275100-1.00082400<br>H-3.12413200-0.10259200-0.99893900<br>H-1.801126000.56694500-0.56498100<br>O1.79725400-1.38484700-0.26434600<br>H1.73725900-1.90136100-1.07084600<br>H0.94101000-1.518391000.20100200  | 33.459840.835553.6752<br>75.4539193.3163196.3674<br>211.6710223.2656250.3946<br>259.5037273.1333287.9226<br>293.9433355.3913404.2971<br>421.2744456.8647560.9672<br>610.1955673.8956706.8735<br>811.9255840.6182953.4711<br>1652.02601657.16241678.3778<br>1694.42451704.91913394.0417<br>3470.20443508.47453631.9859<br>3694.09943856.57933948.7254<br>3949.92923954.71553956.4902  |
| P7 | O-2.26659000-0.132417000.95703800<br>H-1.95906600-0.135653001.86651100<br>H-1.804750000.612171000.53121300<br>O1.799761001.307754000.37099700<br>H2.587000001.63510700-0.06843400<br>H1.899133000.330221000.40346900<br>O-0.67159100-1.41195400-0.97899800<br>H-0.65153400-0.53126100-1.37679200<br>H-1.32539500-1.28926600-0.26754200<br>O-0.691383001.51028600-0.67316100<br>H-0.899804002.37600500-1.02871600<br>H0.227425001.56273700-0.32600200<br>O1.67769400-1.396116000.36907300<br>H0.84806700-1.52297400-0.14680600<br>H2.29579900-2.057513000.05350700 | 27.251536.086967.8024<br>93.3883184.9098212.7276<br>216.6332226.7076247.7087<br>255.4391266.2069279.5208<br>289.0571363.8477377.6507<br>427.1456486.9083516.8460<br>554.7837685.4340754.5317<br>810.9146823.5589952.7440<br>1642.36991660.53481664.3068<br>1685.28231715.03533405.5114<br>3473.21863520.60573650.3011<br>3696.69303842.70723947.3333<br>3952.50633956.85983958.8397  |
| P8 | O-2.28178500-0.037729000.04431200<br>H-2.74116200-0.044037000.88696700<br>H-1.696094000.747892000.06733500<br>O1.510740000.32316000-1.28078500<br>H0.95967900-0.47332300-1.34478400<br>H1.995703000.15834500-0.45729800<br>O-0.289114001.823173000.07495800<br>H0.368774001.41032400-0.53347400<br>H-0.333339002.75172100-0.16136600<br>O-0.23388600-1.75926700-0.39583300<br>H-1.07903900-1.27833600-0.25968600<br>H-0.46307000-2.65892000-0.63553200<br>O1.44688000-0.353016001.52579600<br>H0.886553000.428651001.59096000<br>H0.87931600-1.012880001.09929100 | 25.776646.844580.6774<br>119.2477148.8218215.1968<br>230.5999235.6191252.9245<br>265.2185276.5031281.4036<br>347.9985374.0326403.7575<br>413.6937460.3890514.4900<br>558.5788618.7604747.0135<br>816.3832863.2365962.9639<br>1638.41181655.49121669.4344<br>1682.97551702.09453397.4531<br>3489.12793558.93093742.0760<br>3751.17273801.00233889.3453<br>3946.78033951.95323958.0284 |
| P9 | O-2.61281900-0.155237000.60652600<br>H-2.80156600-0.312374001.53399800                                                                                                                                                                                                                                                                                                                                                                                                                                                                                            | 19.698935.467339.5630<br>56.453878.9797166.2324                                                                                                                                                                                                                                                                                                                                      |

|     |                                                                                                                                                                                                                                                                                                                                                                                                                                                                                                                                                                 |                                                                                                                                                                                                                                                                                                                                                                                      |
|-----|-----------------------------------------------------------------------------------------------------------------------------------------------------------------------------------------------------------------------------------------------------------------------------------------------------------------------------------------------------------------------------------------------------------------------------------------------------------------------------------------------------------------------------------------------------------------|--------------------------------------------------------------------------------------------------------------------------------------------------------------------------------------------------------------------------------------------------------------------------------------------------------------------------------------------------------------------------------------|
|     | H-2.01130500-0.882447000.33262500<br>O3.347382000.120648000.61609200<br>H3.26253700-0.522455001.32535100<br>O-0.71312500-1.92563000-0.22214800<br>H-0.88974700-2.44906100-1.00667600<br>H-0.04887200-1.24934800-0.49964700<br>O-1.002878001.94860500-0.11340900<br>H-1.656892001.283322000.18813800<br>H-1.458741002.47463500-0.77371900<br>O0.910623000.10596200-0.90371200<br>H1.726965000.20844800-0.39208200<br>H0.342748000.86664200-0.67204100<br>H4.10140600-0.172151000.09726300                                                                        | 197.8012212.7538223.0329<br>226.8035247.6402260.0914<br>268.7118287.8168299.3725<br>411.6893448.0310466.1510<br>569.1743684.0838764.7934<br>826.3330871.93071036.3225<br>1626.76601646.41601656.1086<br>1660.91821686.03943362.1878<br>3488.09073544.25223611.9289<br>3764.91523874.67153948.2951<br>3951.18183952.40753983.3839                                                     |
| P10 | O0.00085200-0.06544100-0.01654300<br>H0.609634000.503575000.48810400<br>H-0.619935000.52088300-0.48580900<br>O-2.44909800-1.049008000.87947200<br>H-1.48810100-0.901366000.80671300<br>H-2.65558400-0.970016001.81331600<br>O2.358265000.944615001.05981700<br>H2.706409000.333997000.38402400<br>H2.767784001.793510000.87949400<br>O-2.366194001.08661600-0.90649800<br>H-2.763211000.92552700-1.76519400<br>H-2.710748000.38829600-0.31972700<br>O2.45701200-0.90820400-1.01709500<br>H2.65264500-1.84121400-0.90679200<br>H1.49440400-0.82182400-0.88734500 | 30.096632.028651.5855<br>120.7538172.3757193.6265<br>198.5282205.3356209.0021<br>218.3504246.1852267.8218<br>277.5575353.9903362.8443<br>392.1980417.6094566.1053<br>612.1177650.8167656.2706<br>736.7245918.2735938.9996<br>1638.37221642.40081642.5231<br>1651.75871664.06303580.3759<br>3611.60143657.11703659.2408<br>3681.57643703.76663951.4313<br>3952.79683953.41103953.8751 |
| P11 | O1.676397001.963876001.06345700<br>H2.625466001.838694000.99733400<br>H1.280040001.089629000.89319800<br>O0.000000002.55748100-1.07637700<br>H0.661660002.65651400-0.36707500<br>H-0.654467003.24173100-0.92097400<br>O0.000000000.000000000.01557800<br>H0.22106000-0.75282100-0.56143300<br>H-0.221060000.75282100-0.56143300<br>O-1.67639700-1.963876001.06345700<br>H-1.28004000-1.089629000.89319800<br>H-2.62546600-1.838694000.99733400<br>O0.00000000-2.55748100-1.07637700<br>H-0.66166000-2.65651400-0.36707500<br>H0.65446700-3.24173100-0.92097400  | 29.855035.478552.0884<br>121.3352168.0086184.6148<br>187.2451202.4534207.0242<br>215.4835235.0732249.7204<br>275.9573357.5242363.3673<br>388.4493416.8815556.2752<br>598.7464639.0072695.2407<br>723.3716919.3317925.6893<br>1634.35421641.26291641.8906<br>1654.56211663.16913587.2958<br>3615.74323660.22233661.3033<br>3686.17113710.81553952.8041<br>3952.99603953.28513954.6283 |
| P12 | O-1.752232001.46389400-0.56365300<br>H-2.110493000.58763000-0.31658300<br>H-2.483988002.08039800-0.50417000<br>O0.45197400-1.44243800-0.10536300                                                                                                                                                                                                                                                                                                                                                                                                                | 26.882038.532861.9402<br>88.6143130.3157152.0477<br>171.9788194.4346214.6337<br>225.6807238.5970261.5665                                                                                                                                                                                                                                                                             |

|     |                                                                                                                                                                                                                                                                                                                                                                                                                                                                                                                                                                     |                                                                                                                                                                                                                                                                                                                                                                                       |
|-----|---------------------------------------------------------------------------------------------------------------------------------------------------------------------------------------------------------------------------------------------------------------------------------------------------------------------------------------------------------------------------------------------------------------------------------------------------------------------------------------------------------------------------------------------------------------------|---------------------------------------------------------------------------------------------------------------------------------------------------------------------------------------------------------------------------------------------------------------------------------------------------------------------------------------------------------------------------------------|
|     | H0.50219000-1.31384300-1.05761500<br>H0.47542000-0.528522000.27174200<br>O-2.32224300-1.160525000.13351900<br>H-1.39327700-1.462554000.11486700<br>H-2.64062700-1.372700001.01379200<br>O0.574065001.081237000.83563700<br>H1.400944001.331298000.40554700<br>H-0.158578001.490897000.33870600<br>O3.037373000.05638500-0.32532600<br>H2.56324100-0.74361700-0.06326200<br>H3.93367100-0.05741000-0.00154200                                                                                                                                                        | 287.4466348.4199374.6951<br>439.1676451.6574505.5790<br>572.6226592.3016709.9776<br>744.5990789.35231082.0913<br>1611.00691631.71611655.2916<br>1667.64061680.65793351.4136<br>3560.80573617.45743642.3836<br>3808.52433867.68923910.5711<br>3947.70093961.76583964.6594                                                                                                              |
| P13 | O0.22117300-1.79994100-0.04747800<br>H1.04993100-1.31399800-0.14820000<br>H-0.36377600-1.42633800-0.72236500<br>O2.567685000.00001900-0.09325100<br>H3.018621000.000064000.75579400<br>H3.26352900-0.00007800-0.75589300<br>O-1.754248000.00003700-1.19783100<br>H-2.594345000.00003600-1.66019500<br>H-1.95540100-0.00000100-0.23683100<br>O-1.43114500-0.000056001.50714900<br>H-0.85077100-0.759442001.33433900<br>H-0.850773000.759346001.33440400<br>O0.221148001.79993800-0.04740400<br>H1.049921001.31404700-0.14824400<br>H-0.363844001.42638800-0.72228300 | 41.545583.1816114.1594<br>126.3543160.1592162.2601<br>170.3975193.1086199.2227<br>199.2565220.1519255.3351<br>263.9772401.1011417.2479<br>443.9117477.8299522.8927<br>557.2055585.4324603.9518<br>653.0985839.8141951.8575<br>1630.29431643.10941655.6525<br>1683.64071696.25543507.4566<br>3714.29533744.57363774.0008<br>3783.98353840.87033859.0528<br>3877.39763955.64393978.1069 |
| P14 | O0.32179300-0.78494000-1.25609700<br>H-0.054198000.07329900-1.49379700<br>H1.27486700-0.62075200-1.16748800<br>O-1.125434001.59729100-0.44740800<br>H-1.276938002.54402800-0.47153500<br>H-0.594527001.415432000.34717300<br>O-2.35378900-0.991374000.28060800<br>H-2.27980000-0.08163300-0.03776400<br>H-1.82397400-1.49218900-0.34807000<br>O2.744927000.03972700-0.02783800<br>H2.204109000.089907000.77499300<br>H3.54667800-0.423689000.22334900<br>O0.310460000.047961001.39433200<br>H-0.32263200-0.290237002.03410200<br>H0.14277000-0.483490000.59025600   | 26.733046.158779.8826<br>123.1934152.3967156.6827<br>166.6144180.6440189.2251<br>203.8608219.8076269.4489<br>303.2909348.2086355.8470<br>387.9350409.3679443.8067<br>484.6436518.1608551.5440<br>730.5133763.8435923.3029<br>1633.62121636.01391648.3395<br>1660.99151678.56143575.1583<br>3683.72083722.00843762.3689<br>3801.98743842.48403918.5939<br>3923.24303960.28243962.9292  |
| P15 | O-1.35406400-2.02767900-0.53511900<br>H-1.85589700-2.14355900-1.34426800<br>H-0.59250000-1.47014600-0.77034700<br>O0.57808400-0.00104700-0.40798100<br>H0.17820300-0.000784000.48463800<br>H1.54086400-0.00160200-0.28829900                                                                                                                                                                                                                                                                                                                                        | 24.028044.920051.3158<br>59.5808108.5229125.6761<br>141.7519165.4300195.4035<br>197.7286212.7437233.6462<br>239.4948267.7705341.7634<br>394.9498398.7573525.7138                                                                                                                                                                                                                      |

|  |                                                                                                                                                                                                                                                                                                                                     |                                                                                                                                                                                                                 |
|--|-------------------------------------------------------------------------------------------------------------------------------------------------------------------------------------------------------------------------------------------------------------------------------------------------------------------------------------|-----------------------------------------------------------------------------------------------------------------------------------------------------------------------------------------------------------------|
|  | O-1.357737000.001552001.54405100<br>H-1.70252300-0.762045001.05675100<br>H-1.699779000.765523001.05528700<br>O-1.351038002.02921700-0.53687800<br>H-1.859252002.13293800-1.34372500<br>H-0.590450001.46968600-0.77059900<br>O3.38003700-0.001163000.04480900<br>H3.70932400-0.763129000.52910600<br>H3.709751000.766081000.52040600 | 545.5480590.8904602.2145<br>784.9121839.6006931.3869<br>1623.26541637.64151641.8391<br>1665.50221671.71973559.2904<br>3674.93363702.66813731.6110<br>3750.45553817.13653874.0613<br>3960.41953962.53423982.2641 |
|--|-------------------------------------------------------------------------------------------------------------------------------------------------------------------------------------------------------------------------------------------------------------------------------------------------------------------------------------|-----------------------------------------------------------------------------------------------------------------------------------------------------------------------------------------------------------------|
